# Supplementary material
Source: PubMed Central journal article supplement (PMC6993142)

## Supporting Information for

### **Withanolides from Aeroponically Grown *Physalis peruviana* and Their Selective Cytotoxicity to Prostate Cancer and Renal Carcinoma Cells**

Ya-ming Xu,<sup>†</sup> E. M. Kithsiri Wijeratne,<sup>†</sup> Ashley L. Babyak,<sup>‡</sup> Hanna R. Marks,<sup>‡</sup> Alan D. Brooks,<sup>‡</sup> Poonam Tewary,<sup>‡</sup> Li-Jiang Xuan,<sup>§</sup> Wen-qiong Wang,<sup>§</sup> Thomas J. Sayers,<sup>‡</sup> and A. A. Leslie Gunatilaka<sup>\*,†</sup>

<sup>†</sup>Natural Products Center, School of Natural Resources and the Environment, College of Agriculture and Life Sciences, University of Arizona, 250 E. Valencia Road, Tucson, Arizona 85706, United States

<sup>‡</sup>Basic Research Program, Leidos Biomedical Research, Inc., Frederick National Laboratory for Cancer Research, and Cancer and Inflammation Program, National Cancer Institute-Frederick, Maryland 21702, United States

<sup>§</sup>State Key Laboratory of Drug Research, Shanghai Institute of Materia Medica, Chinese Academy of Sciences, 501 Haike Road, Zhangjiang Hi-Tech Park, Shanghai 201203, People's Republic of China

## Table of Contents

|                    |                                                                                                                               |            |
|--------------------|-------------------------------------------------------------------------------------------------------------------------------|------------|
| <b>Figure S1.</b>  | <sup>1</sup> H NMR Spectrum (400 MHz) of Perulactone I ( <b>1</b> ) in CDCl <sub>3</sub>                                      | <b>S3</b>  |
| <b>Figure S2.</b>  | <sup>13</sup> C NMR Spectrum (100 MHz) of Perulactone I ( <b>1</b> ) in CDCl <sub>3</sub>                                     | <b>S3</b>  |
| <b>Figure S3.</b>  | HSQC Spectrum (400 MHz) of Perulactone I ( <b>1</b> ) in CDCl <sub>3</sub>                                                    | <b>S4</b>  |
| <b>Figure S4.</b>  | HMBC Spectrum (400 MHz) of Perulactone I ( <b>1</b> ) in CDCl <sub>3</sub>                                                    | <b>S4</b>  |
| <b>Figure S5.</b>  | 1D NOESY spectra (400 MHz) of Perulactone I ( <b>1</b> ) in CDCl <sub>3</sub>                                                 | <b>S5</b>  |
| <b>Figure S6.</b>  | <sup>1</sup> H NMR Spectrum (400 MHz) of Perulactone J ( <b>2</b> ) in CDCl <sub>3</sub>                                      | <b>S5</b>  |
| <b>Figure S7.</b>  | <sup>13</sup> C NMR Spectrum (100 MHz) Perulactone J ( <b>2</b> ) in CDCl <sub>3</sub>                                        | <b>S6</b>  |
| <b>Figure S8.</b>  | <sup>1</sup> H- <sup>1</sup> H COSY Spectrum (400 MHz) Perulactone J ( <b>2</b> ) in CDCl <sub>3</sub>                        | <b>S6</b>  |
| <b>Figure S9.</b>  | HSQC Spectrum (400 MHz) Perulactone J ( <b>2</b> ) in CDCl <sub>3</sub>                                                       | <b>S7</b>  |
| <b>Figure S10.</b> | HMBC Spectrum (400 MHz) of Perulactone J ( <b>2</b> ) in CDCl <sub>3</sub>                                                    | <b>S7</b>  |
| <b>Figure S11.</b> | 1D NOESY Spectra (400 MHz) of Perulactone J ( <b>2</b> ) in CDCl <sub>3</sub>                                                 | <b>S8</b>  |
| <b>Figure S12.</b> | <sup>1</sup> H NMR Spectrum (400 MHz) of Perulactone K ( <b>3</b> ) in CDCl <sub>3</sub>                                      | <b>S8</b>  |
| <b>Figure S13.</b> | <sup>13</sup> C NMR Spectrum (100 MHz) of Perulactone K ( <b>3</b> ) in CDCl <sub>3</sub>                                     | <b>S9</b>  |
| <b>Figure S14.</b> | HSQC Spectrum (400 MHz) of Perulactone K ( <b>3</b> ) in CDCl <sub>3</sub>                                                    | <b>S9</b>  |
| <b>Figure S15.</b> | HMBC Spectrum (400 MHz) of Perulactone K ( <b>3</b> ) in CDCl <sub>3</sub>                                                    | <b>S10</b> |
| <b>Figure S16.</b> | 1D NOESY Spectra (400 MHz) of Perulactone K ( <b>3</b> ) in CDCl <sub>3</sub>                                                 | <b>S10</b> |
| <b>Figure S17.</b> | <sup>1</sup> H NMR Spectrum (400 MHz) of Perulactone L ( <b>4</b> ) in CDCl <sub>3</sub>                                      | <b>S11</b> |
| <b>Figure S18.</b> | <sup>13</sup> C NMR Spectrum (100 MHz) of Perulactone L ( <b>4</b> ) in CDCl <sub>3</sub>                                     | <b>S11</b> |
| <b>Figure S19.</b> | HSQC Spectrum (400 MHz) of Perulactone L ( <b>4</b> ) in CDCl <sub>3</sub>                                                    | <b>S12</b> |
| <b>Figure S20.</b> | 1D NOESY Spectra (400 MHz) of Perulactone L ( <b>4</b> ) in CDCl <sub>3</sub>                                                 | <b>S12</b> |
| <b>Figure S21.</b> | <sup>1</sup> H NMR Spectrum (400 MHz) of 17-Deoxy-23β-hydroxywithanolide E ( <b>5</b> ) in CDCl <sub>3</sub>                  | <b>S13</b> |
| <b>Figure S22.</b> | <sup>13</sup> C NMR Spectrum (100 MHz) of 17-Deoxy-23β-hydroxywithanolide E ( <b>5</b> ) in CDCl <sub>3</sub>                 | <b>S13</b> |
| <b>Figure S23.</b> | <sup>1</sup> H- <sup>1</sup> H COSY Spectrum (400 MHz) of 17-Deoxy-23β-hydroxywithanolide E ( <b>5</b> ) in CDCl <sub>3</sub> | <b>S14</b> |
| <b>Figure S24.</b> | HSQC Spectrum (400 MHz) of 17-Deoxy-23β-hydroxywithanolide E ( <b>5</b> ) in CDCl <sub>3</sub>                                | <b>S14</b> |
| <b>Figure S25.</b> | HMBC Spectrum (400 MHz) of 17-Deoxy-23β-hydroxywithanolide E ( <b>5</b> ) in CDCl <sub>3</sub>                                | <b>S15</b> |
| <b>Figure S26.</b> | 1D NOESY Spectra (400 MHz) of 17-Deoxy-23β-hydroxywithanolide E ( <b>5</b> ) in CDCl <sub>3</sub>                             | <b>S15</b> |
| <b>Figure S27.</b> | <sup>1</sup> H NMR Spectrum (400 MHz) of 23β-Hydroxywithanolide E ( <b>6</b> ) in CDCl <sub>3</sub>                           | <b>S16</b> |
| <b>Figure S28.</b> | <sup>13</sup> C NMR Spectrum (100 MHz) of 23β-Hydroxywithanolide E ( <b>6</b> ) in CDCl <sub>3</sub>                          | <b>S16</b> |
| <b>Figure S29.</b> | <sup>1</sup> H- <sup>1</sup> H COSY Spectrum (400 MHz) of 23β-Hydroxywithanolide E ( <b>6</b> ) in CDCl <sub>3</sub>          | <b>S17</b> |
| <b>Figure S30.</b> | HSQC Spectrum (400 MHz) of 23β-Hydroxywithanolide E ( <b>6</b> ) in CDCl <sub>3</sub>                                         | <b>S17</b> |
| <b>Figure S31.</b> | HMBC Spectrum (400 MHz) of 23β-Hydroxywithanolide E ( <b>6</b> ) in CDCl <sub>3</sub>                                         | <b>S18</b> |
| <b>Figure S32.</b> | 1D NOESY Spectra (400 MHz) of 23β-Hydroxywithanolide E ( <b>6</b> ) in CDCl <sub>3</sub>                                      | <b>S18</b> |
| <b>Figure S33.</b> | <sup>1</sup> H NMR Spectrum (400 MHz) of 4-Deoxyphyperunolide A ( <b>7</b> ) in CDCl <sub>3</sub>                             | <b>S19</b> |
| <b>Figure S34.</b> | <sup>13</sup> C NMR Spectrum (100 MHz) of 4-Deoxyphyperunolide A ( <b>7</b> ) in CDCl <sub>3</sub>                            | <b>S19</b> |
| <b>Figure S35.</b> | HSQC Spectrum (400 MHz) of 4-Deoxyphyperunolide A ( <b>7</b> ) in CDCl <sub>3</sub>                                           | <b>S20</b> |
| <b>Figure S36.</b> | HMBC Spectrum (400 MHz) of 4-Deoxyphyperunolide A ( <b>7</b> ) in CDCl <sub>3</sub>                                           | <b>S20</b> |
| <b>Figure S37.</b> | 1D NOESY Spectrum (400 MHz) of 4-Deoxyphyperunolide A ( <b>7</b> ) in CDCl <sub>3</sub>                                       | <b>S21</b> |
| <b>Figure S38.</b> | <sup>1</sup> H NMR Spectrum (400 MHz) of 4-Deoxyphyperunolide A ( <b>8</b> ) in CDCl <sub>3</sub>                             | <b>S21</b> |
| <b>Figure S39.</b> | <sup>13</sup> C NMR Spectrum (100 MHz) of 7β-Hydroxywithanolide F ( <b>8</b> ) in CDCl <sub>3</sub>                           | <b>S22</b> |
| <b>Figure S40.</b> | HSQC Spectrum (400 MHz) of 7β-Hydroxywithanolide F ( <b>8</b> ) in CDCl <sub>3</sub>                                          | <b>S22</b> |
| <b>Figure S41.</b> | HMBC Spectrum (400 MHz) of 7β-Hydroxywithanolide F ( <b>8</b> ) in CDCl <sub>3</sub>                                          | <b>S23</b> |
| <b>Figure S42.</b> | 1D NOESY spectra (400 MHz) of 7β-Hydroxywithanolide F ( <b>8</b> ) in CDCl <sub>3</sub>                                       | <b>S23</b> |

|                    |                                                                                                                                                            |            |
|--------------------|------------------------------------------------------------------------------------------------------------------------------------------------------------|------------|
| <b>Figure S43.</b> | <sup>1</sup> H NMR Spectrum (400 MHz) of 7 $\beta$ -Hydroxy-17- <i>epi</i> -withanolide K ( <b>9</b> ) in CDCl <sub>3</sub>                                | <b>S24</b> |
| <b>Figure S44.</b> | <sup>13</sup> C NMR Spectrum (100 MHz) of 7 $\beta$ -Hydroxy-17- <i>epi</i> -withanolide K ( <b>9</b> ) in CDCl <sub>3</sub>                               | <b>S24</b> |
| <b>Figure S45.</b> | HSQC Spectrum (400 MHz) of 7 $\beta$ -Hydroxy-17- <i>epi</i> -withanolide K ( <b>9</b> ) in CDCl <sub>3</sub>                                              | <b>S25</b> |
| <b>Figure S46.</b> | HMBC Spectrum (400 MHz) of 7 $\beta$ -Hydroxy-17- <i>epi</i> -withanolide K ( <b>9</b> ) in CDCl <sub>3</sub>                                              | <b>S25</b> |
| <b>Figure S47.</b> | 1D NOESY Spectra (400 MHz) of 7 $\beta$ -Hydroxy-17- <i>epi</i> -withanolide K ( <b>9</b> ) in CDCl <sub>3</sub>                                           | <b>S26</b> |
| <b>Figure S48.</b> | <sup>1</sup> H NMR Spectrum (400 MHz) of 24,25-Dihydro-23 $\beta$ ,28-dihydroxywithanolide G ( <b>10</b> ) in CDCl <sub>3</sub>                            | <b>S26</b> |
| <b>Figure S49.</b> | <sup>13</sup> C NMR Spectrum (100 MHz) of 24,25-Dihydro-23 $\beta$ ,28-dihydroxywithanolide G ( <b>10</b> ) in CDCl <sub>3</sub>                           | <b>S27</b> |
| <b>Figure S50.</b> | <sup>1</sup> H- <sup>1</sup> H COSY Spectrum (400 MHz) of 24,25-Dihydro-23 $\beta$ ,28-dihydroxywithanolide G ( <b>10</b> ) in CDCl <sub>3</sub>           | <b>S27</b> |
| <b>Figure S51.</b> | HSQC Spectrum (400 MHz) of 24,25-Dihydro-23 $\beta$ ,28-dihydroxywithanolide G ( <b>10</b> ) in CDCl <sub>3</sub>                                          | <b>S28</b> |
| <b>Figure S52.</b> | HMBC Spectrum (400 MHz) of 24,25-Dihydro-23 $\beta$ ,28-dihydroxywithanolide G ( <b>10</b> ) in CDCl <sub>3</sub>                                          | <b>S28</b> |
| <b>Figure S53.</b> | 1D NOESY Spectra (400 MHz) of 24,25-Dihydro-23 $\beta$ ,28-dihydroxywithanolide G ( <b>10</b> ) in CDCl <sub>3</sub>                                       | <b>S29</b> |
| <b>Figure S54.</b> | <sup>1</sup> H NMR Spectrum (400 MHz) of 24,25-Dihydrowithanolide E ( <b>11</b> ) in CDCl <sub>3</sub>                                                     | <b>S29</b> |
| <b>Figure S55.</b> | <sup>13</sup> C NMR Spectrum (100 MHz) of 24,25-Dihydrowithanolide E ( <b>11</b> ) in CDCl <sub>3</sub>                                                    | <b>S30</b> |
| <b>Figure S56.</b> | HSQC Spectrum (400 MHz) of 24,25-Dihydrowithanolide E ( <b>11</b> ) in CDCl <sub>3</sub>                                                                   | <b>S30</b> |
| <b>Figure S57.</b> | HMBC Spectrum (400 MHz) of 24,25-Dihydrowithanolide E ( <b>11</b> ) in CDCl <sub>3</sub>                                                                   | <b>S31</b> |
| <b>Figure S58.</b> | 1D NOESY Spectra (400 MHz) of 24,25-Dihydrowithanolide E ( <b>11</b> ) in CDCl <sub>3</sub>                                                                | <b>S31</b> |
| <b>Figure S59.</b> | Key HMBC Correlations of <b>1</b> , <b>3</b> , <b>5</b> , and <b>7-11</b> , and <sup>1</sup> H- <sup>1</sup> H COSY Correlations of <b>5</b> and <b>10</b> | <b>S32</b> |
| <b>Figure S60.</b> | Key NOESY Correlations of <b>1</b> , <b>3-5</b> , and <b>7-11</b>                                                                                          | <b>S33</b> |
| <b>Figure S61.</b> | CD spectra of <b>1-11</b>                                                                                                                                  | <b>S34</b> |

**Figure S1.**  $^1\text{H}$  NMR Spectrum (400 MHz) of Perulactone I (**1**) in  $\text{CDCl}_3$

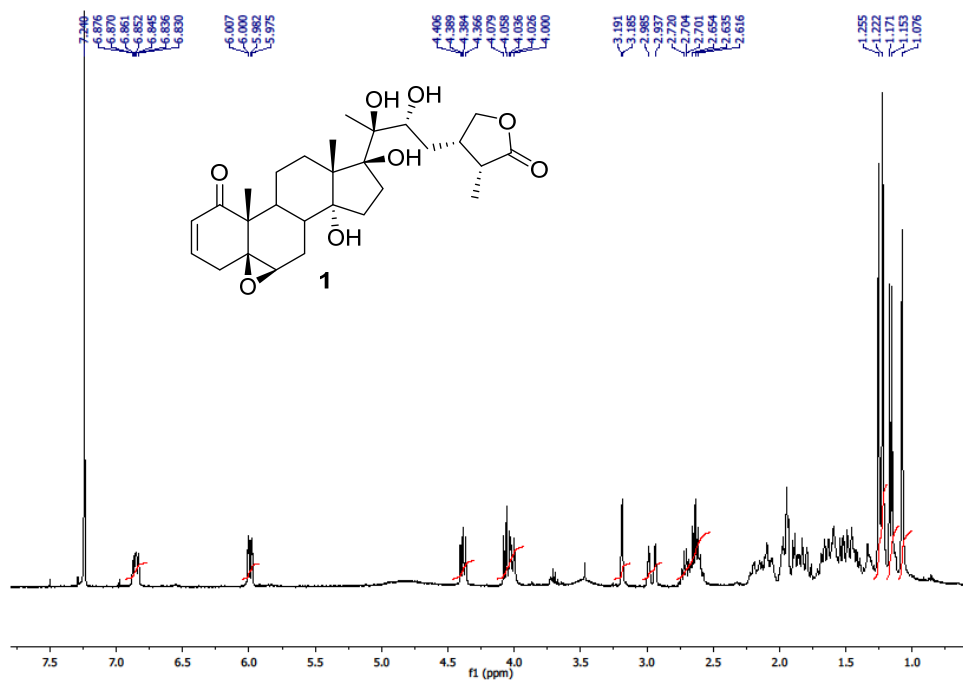

**Figure S2.**  $^{13}\text{C}$  NMR Spectrum (100 MHz) of Perulactone I (**1**) in  $\text{CDCl}_3$

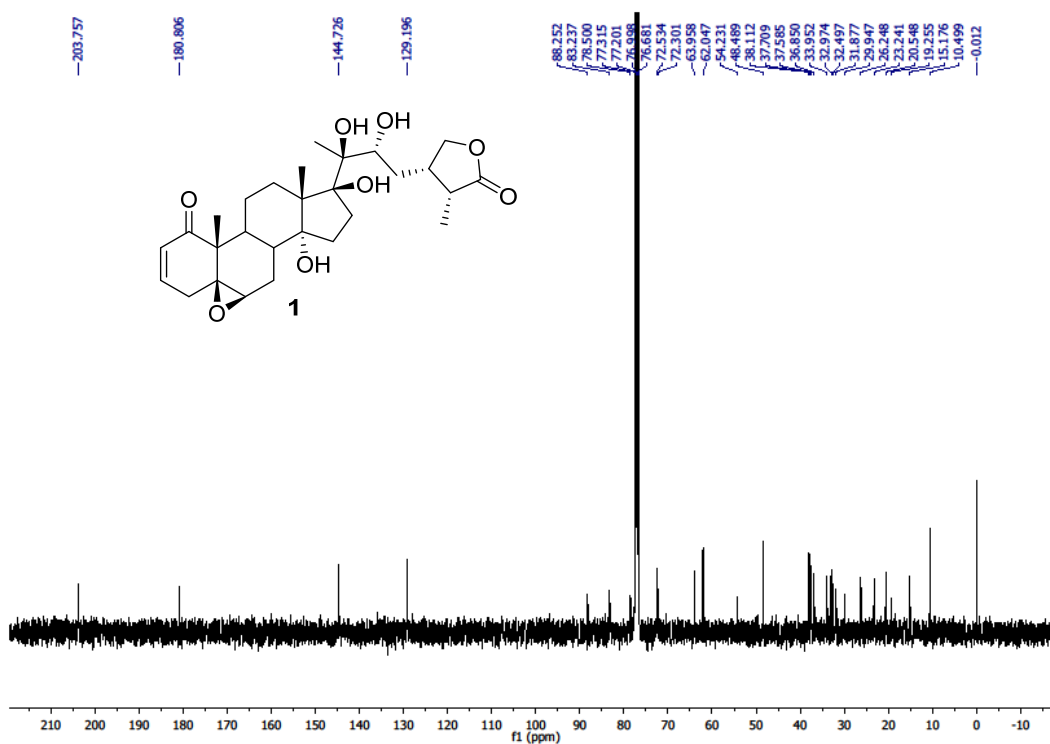

Figure S3. HSQC Spectrum (400 MHz) of Perulactone I (1) in CDCl<sub>3</sub>

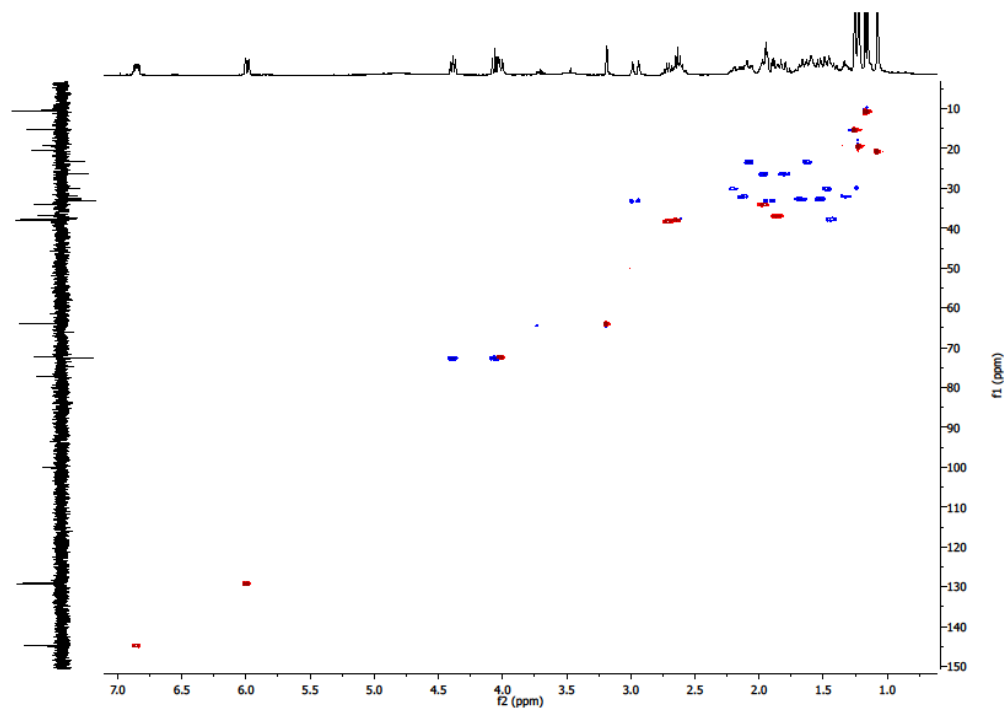

Figure S4. HMBC Spectrum (400 MHz) of Perulactone I (1) in CDCl<sub>3</sub>

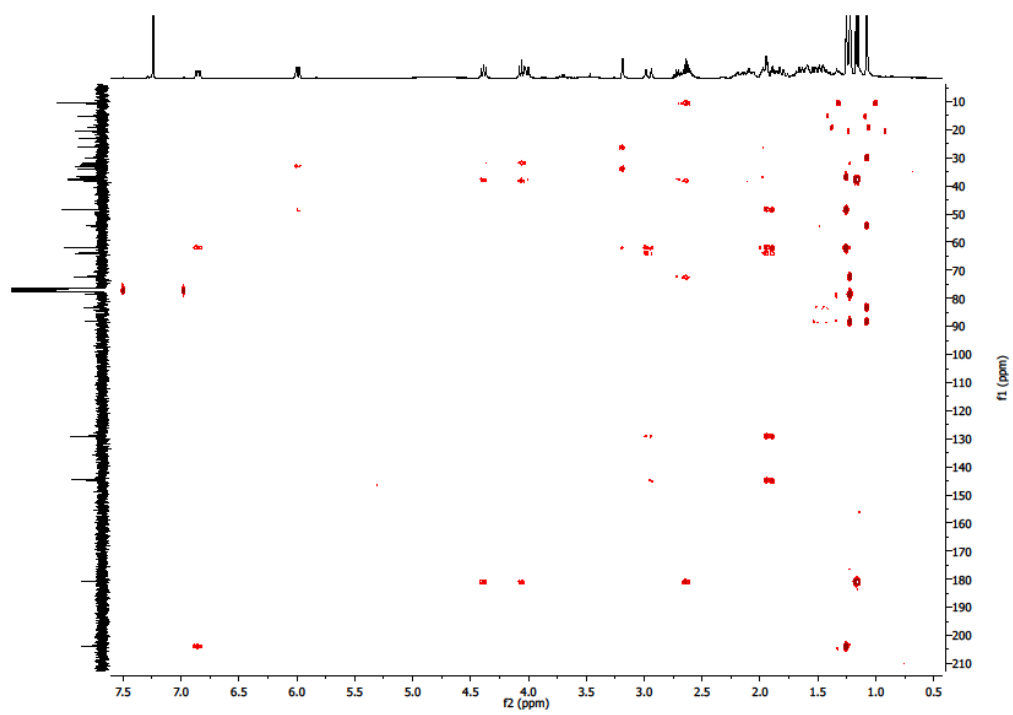

Figure S5. 1D NOESY spectra (400 MHz) of Perulactone I (1) in CDCl<sub>3</sub>

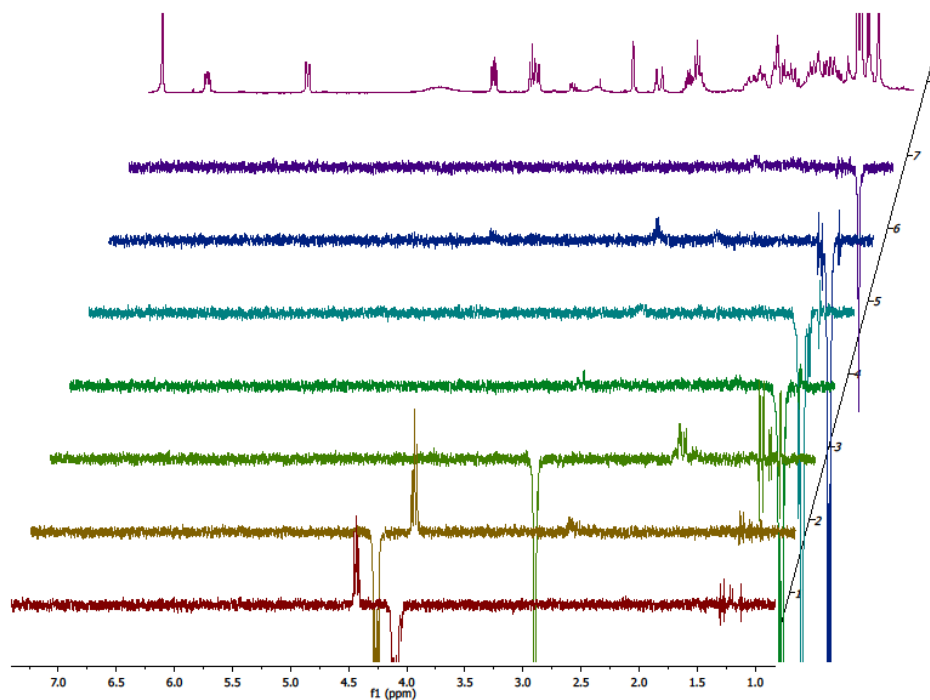

Figure S6. <sup>1</sup>H NMR Spectrum (400 MHz) of Perulactone J (2) in CDCl<sub>3</sub>

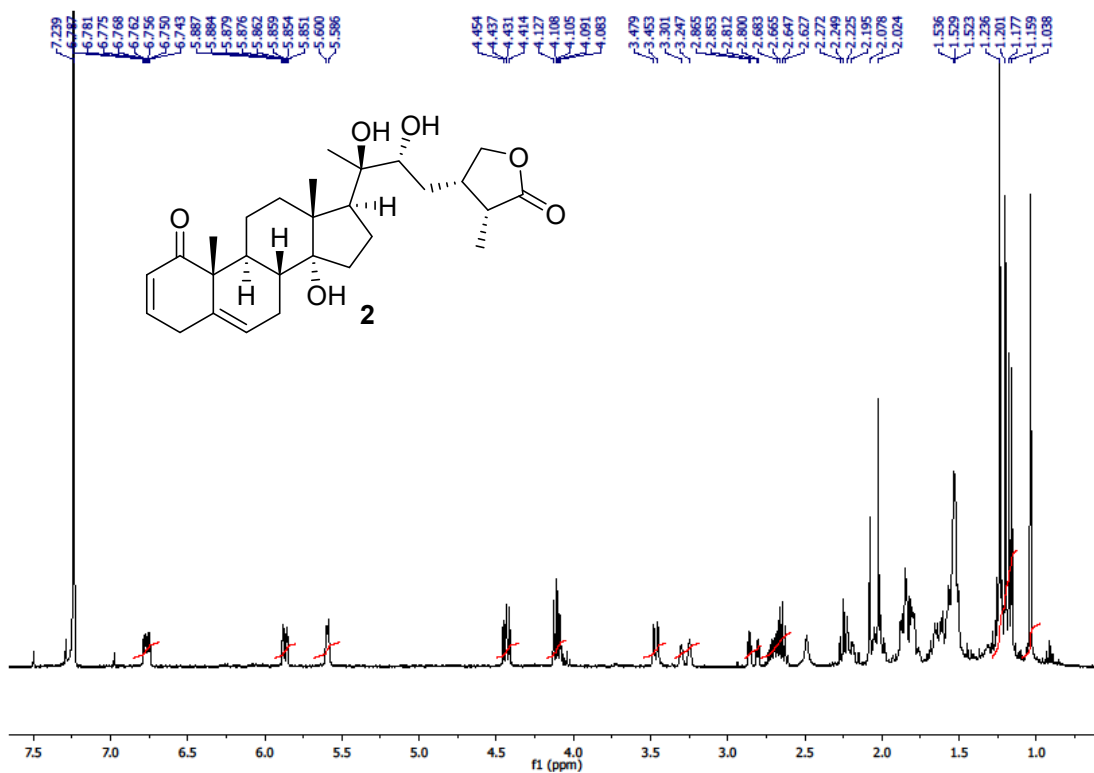

Figure S7.  $^{13}\text{C}$  NMR Spectrum (100 MHz) Perulactone J (2) in  $\text{CDCl}_3$

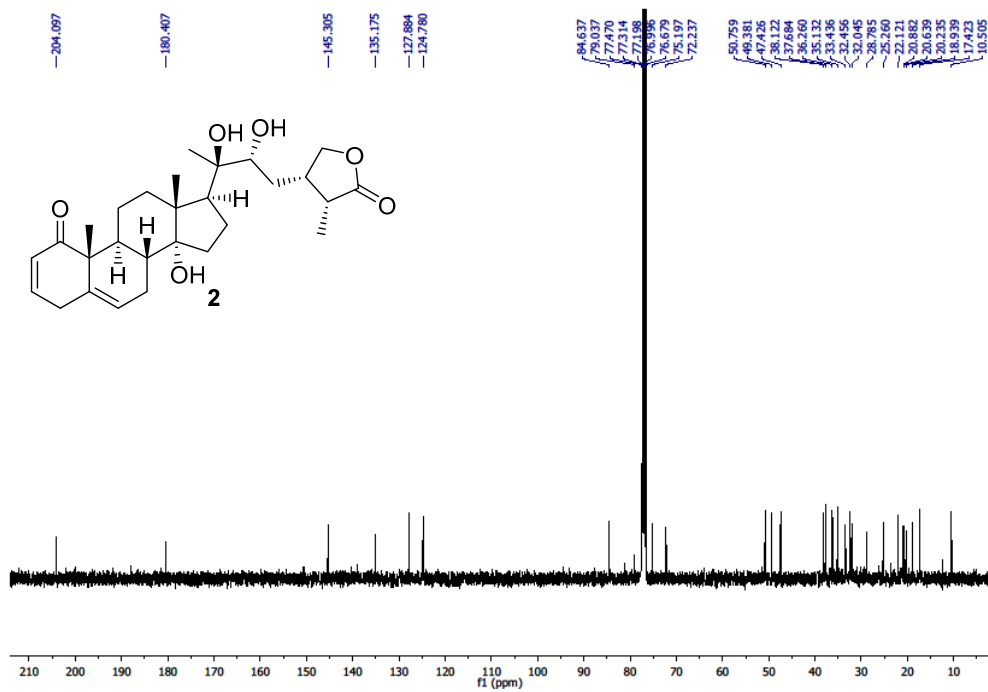

Figure S8.  $^1\text{H}$ - $^1\text{H}$  COSY Spectrum (400 MHz) Perulactone J (2) in  $\text{CDCl}_3$

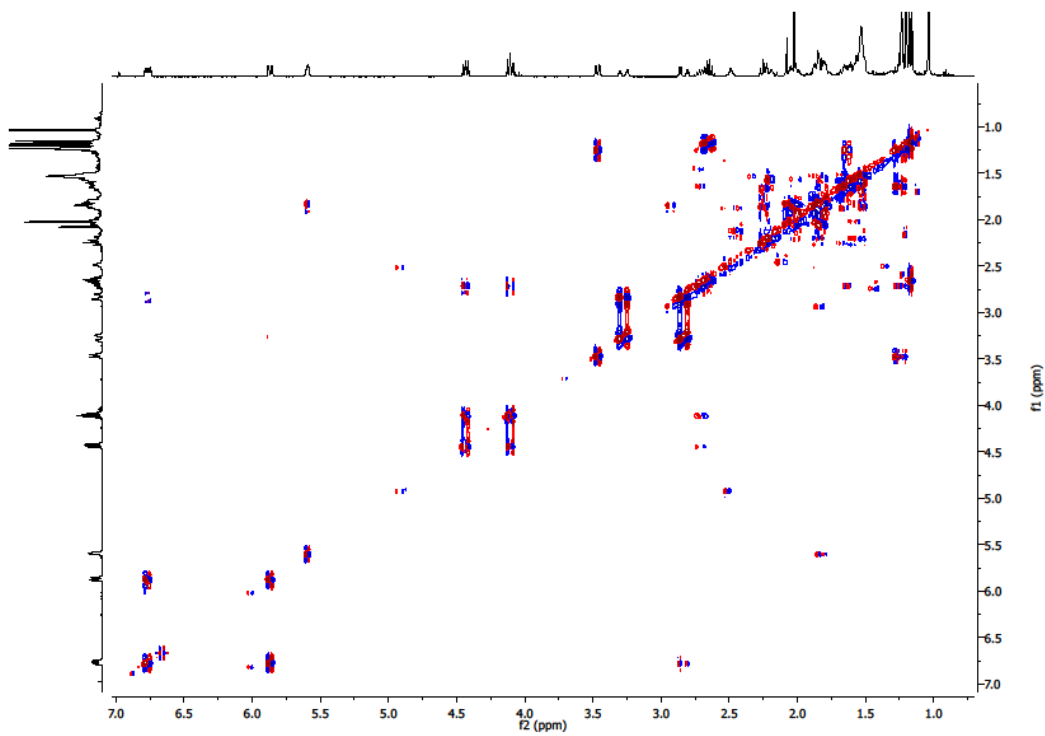

Figure S9. HSQC Spectrum (400 MHz) Perulactone J (2) in CDCl<sub>3</sub>

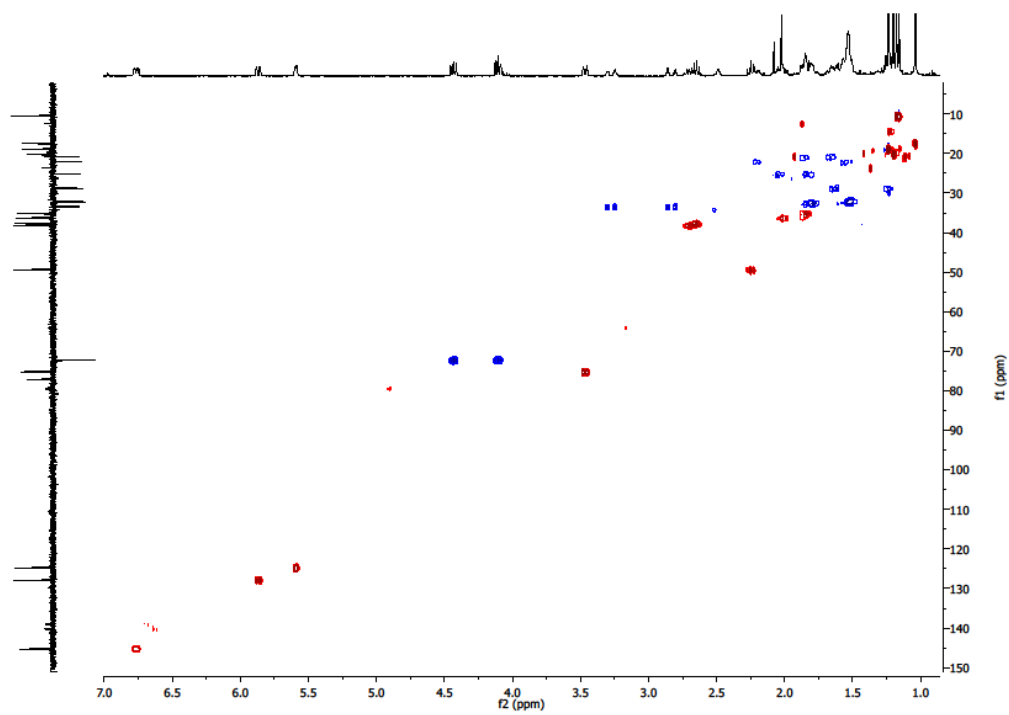

Figure S10. HMBC Spectrum (400 MHz) Perulactone J (2) in CDCl<sub>3</sub>

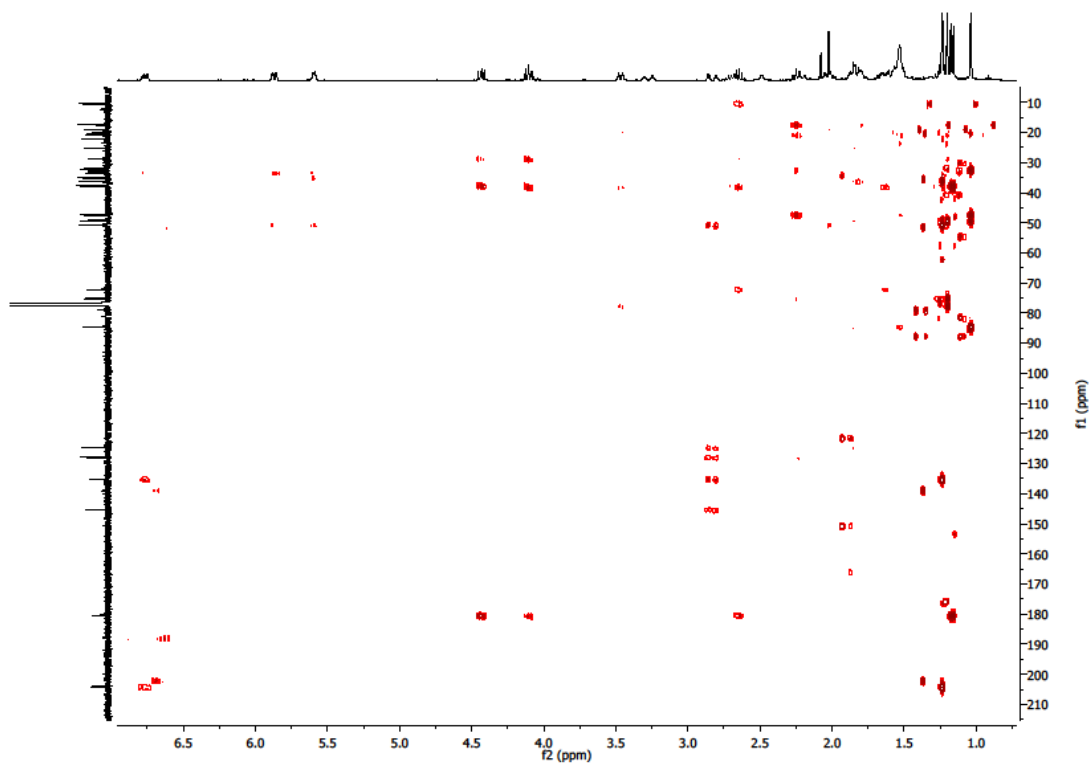



Figure S11. 1D NOESY spectra (400 MHz) of Perulactone J (2) in CDCl<sub>3</sub>

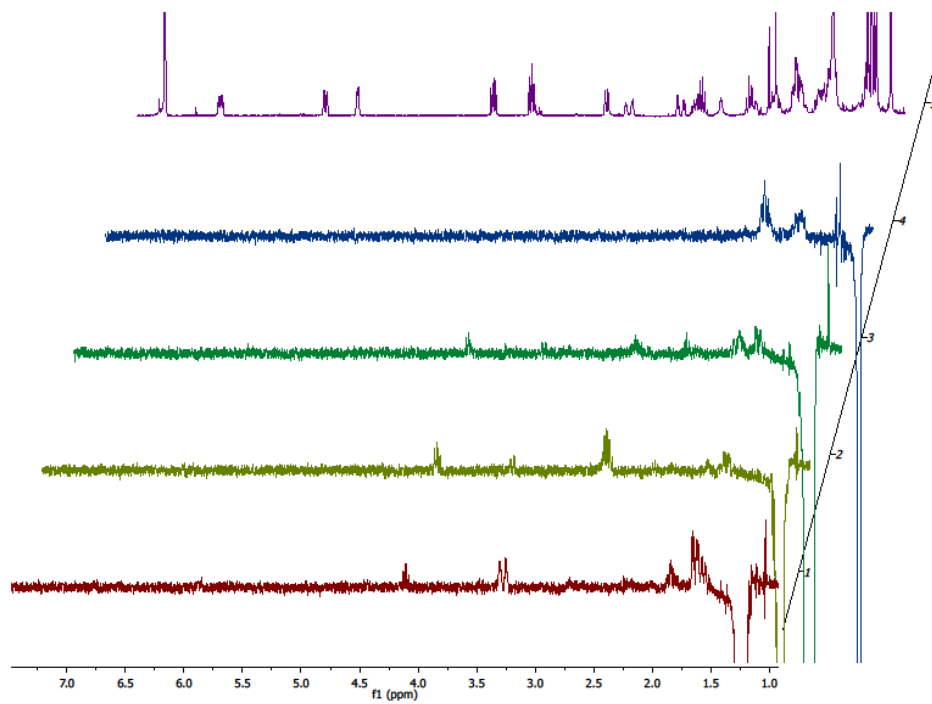

Figure S12. <sup>1</sup>H NMR Spectrum (400 MHz) of Perulactone K (3) in CDCl<sub>3</sub>

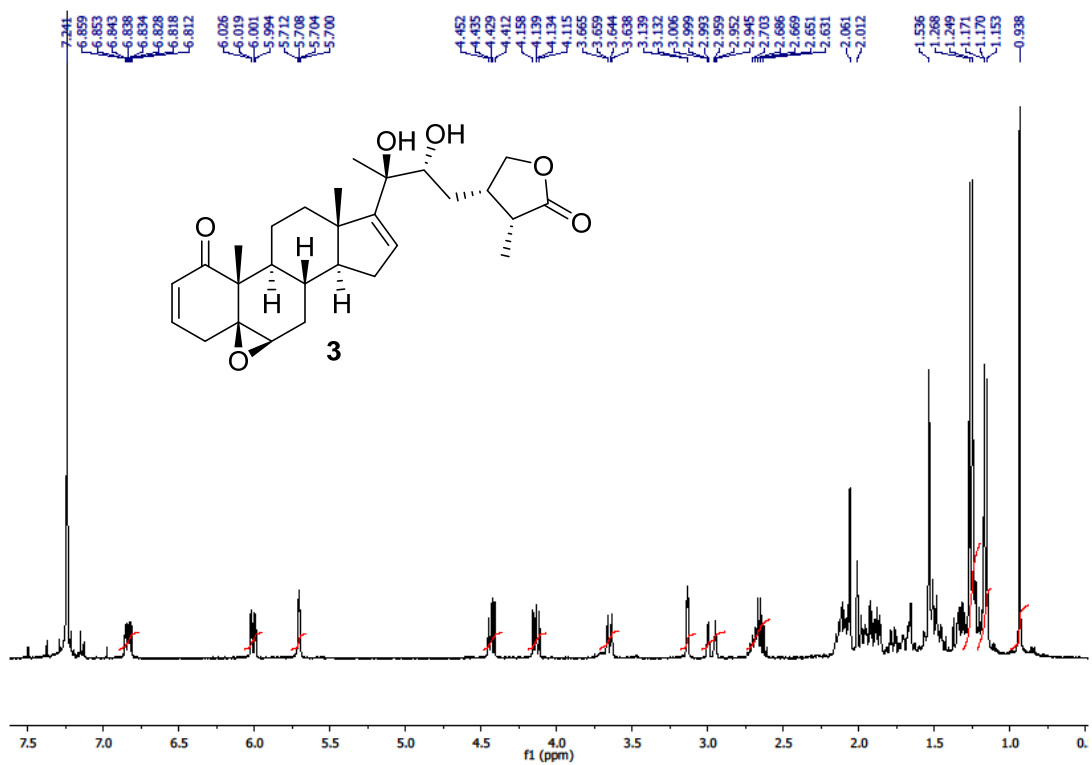

Figure S13.  $^{13}\text{C}$  NMR Spectrum (100 MHz) Perulactone K (**3**) in  $\text{CDCl}_3$

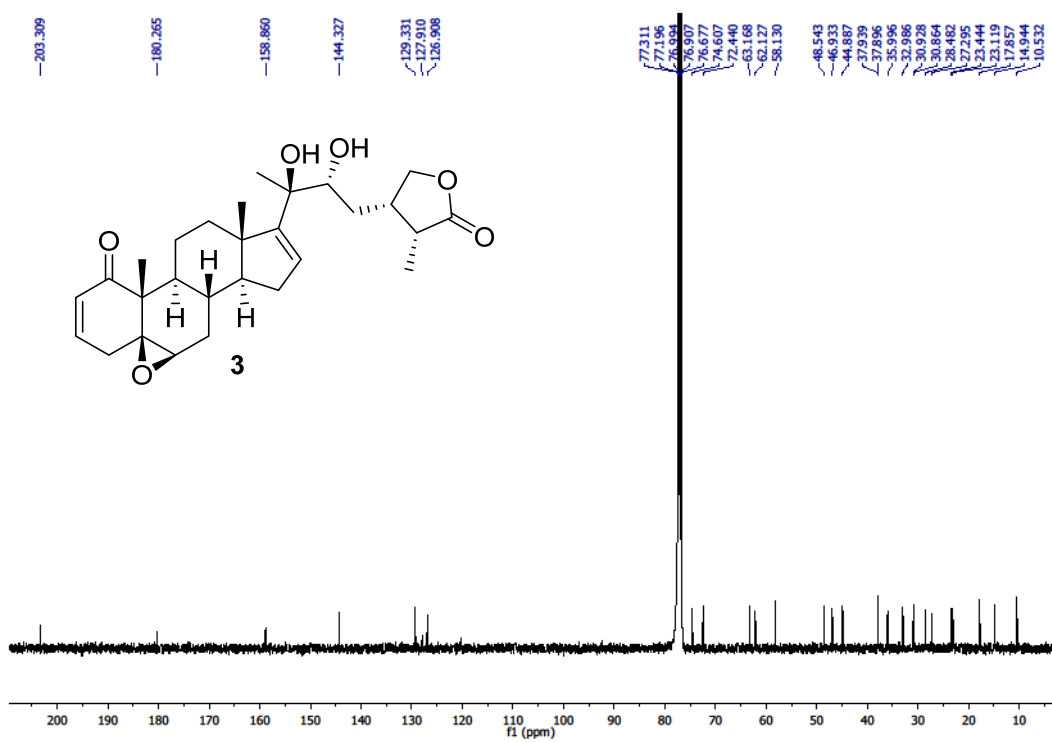

Figure S14. HSQC Spectrum (400 MHz) Perulactone K (**3**) in  $\text{CDCl}_3$

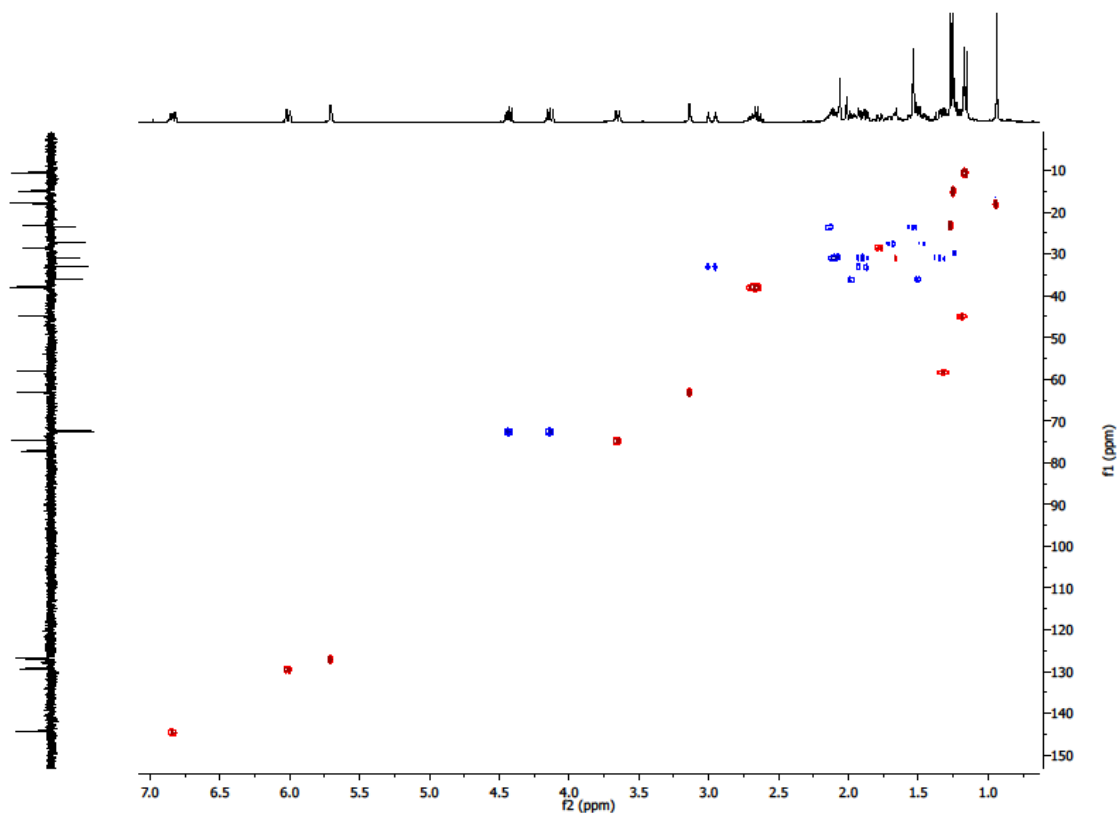

**Figure S15.** HMBC Spectrum (400 MHz) of Perulactone K (**3**) in CDCl<sub>3</sub>

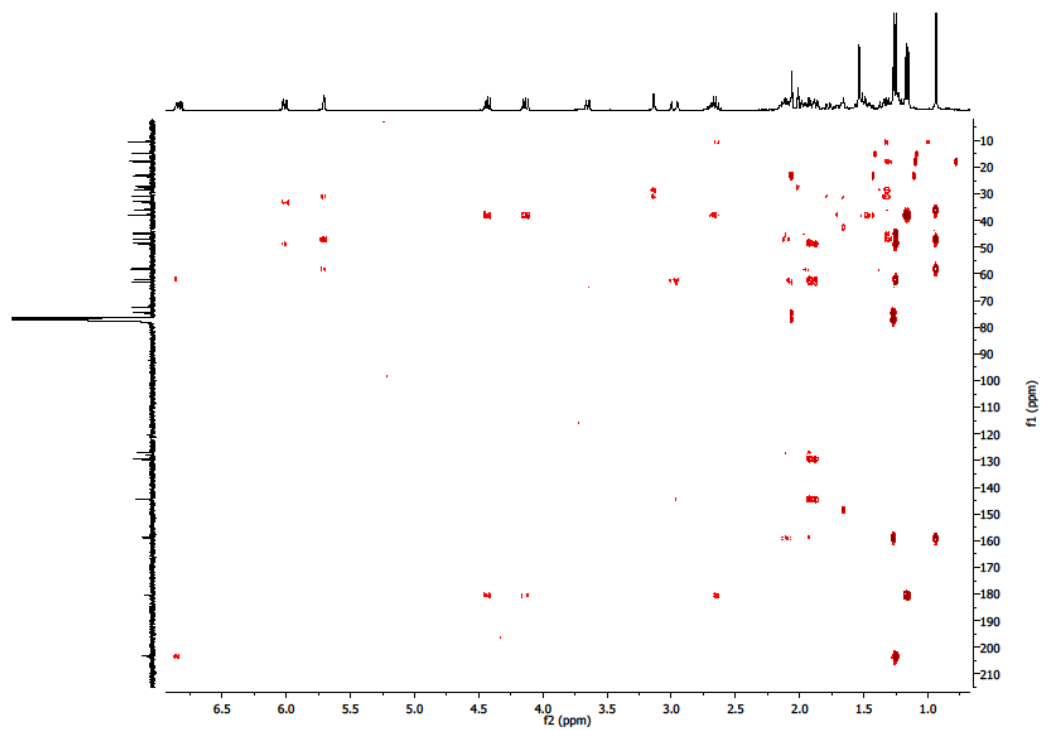

**Figure S16.** 1D NOESY Spectra (400 MHz) of Perulactone K (**3**) in CDCl<sub>3</sub>

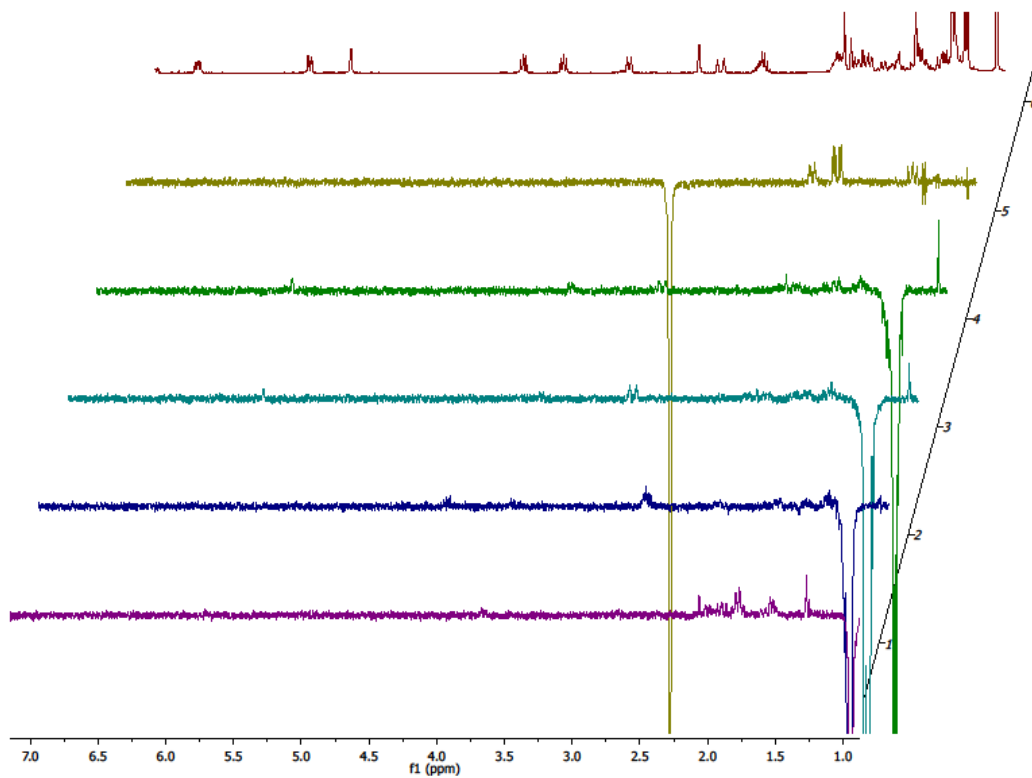

Figure S17. <sup>1</sup>H NMR Spectrum (400 MHz) of Perulactone L (**4**) in CDCl<sub>3</sub>

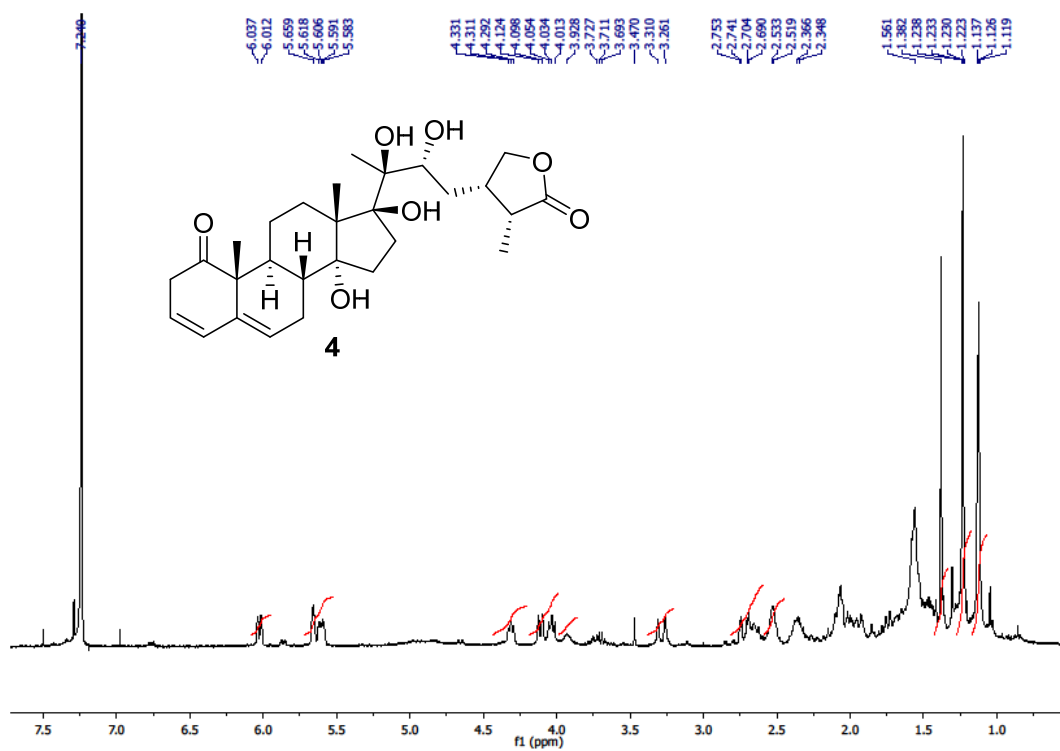

Figure S18. <sup>13</sup>C NMR Spectrum (100 MHz) of Perulactone L (**4**) in CDCl<sub>3</sub>

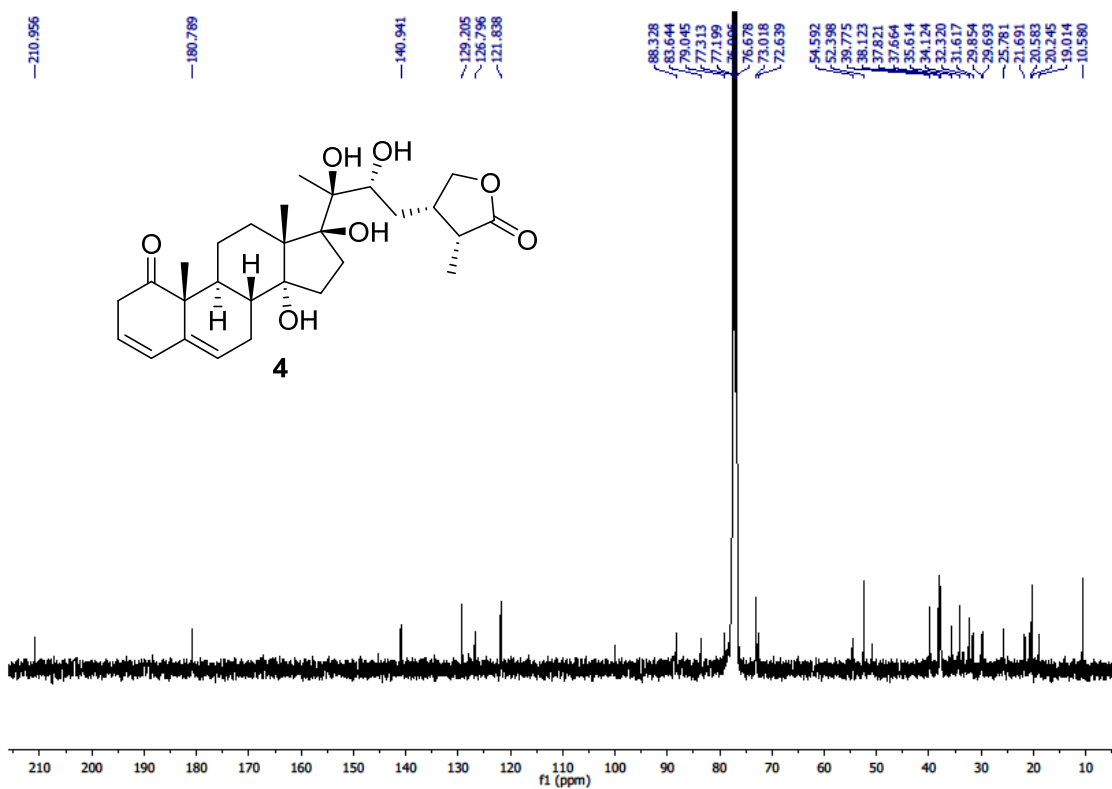

Figure S19. HSQC Spectrum (400 MHz) of Perulactone L (4) in CDCl<sub>3</sub>

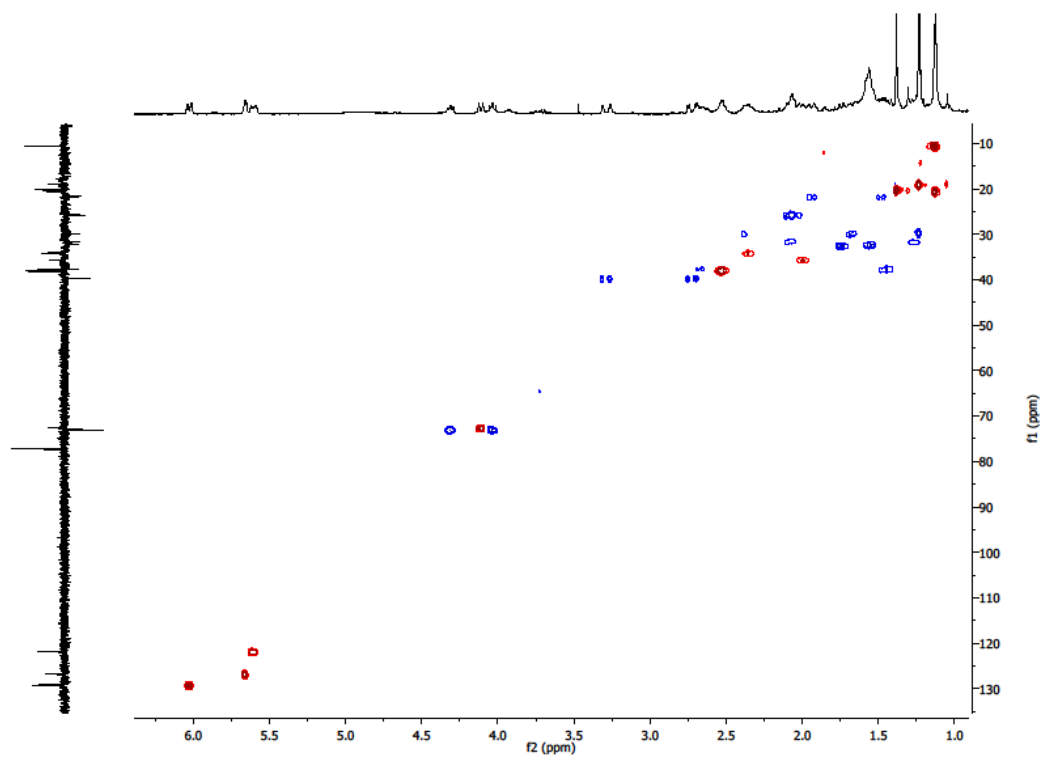

Figure S20. 1D NOESY Spectra (400 MHz) of Perulactone L (4) in CDCl<sub>3</sub>

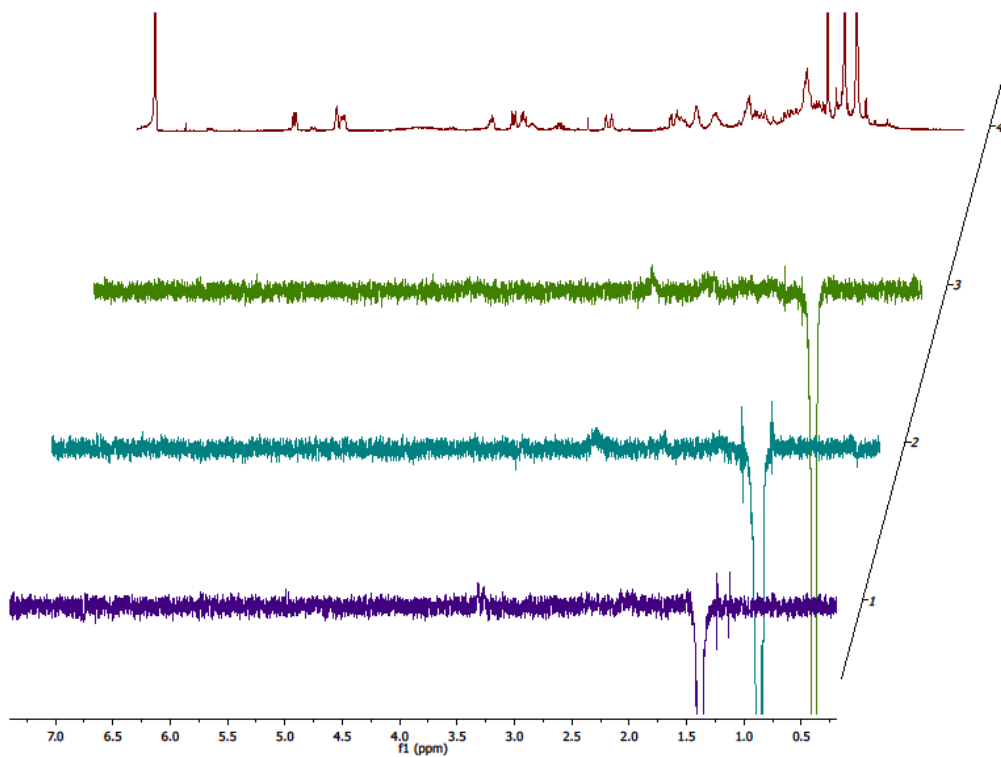

Figure S21. <sup>1</sup>H NMR Spectrum (400 MHz) of 17-Deoxy-23β-hydroxywithanolide E (5) in CDCl<sub>3</sub>

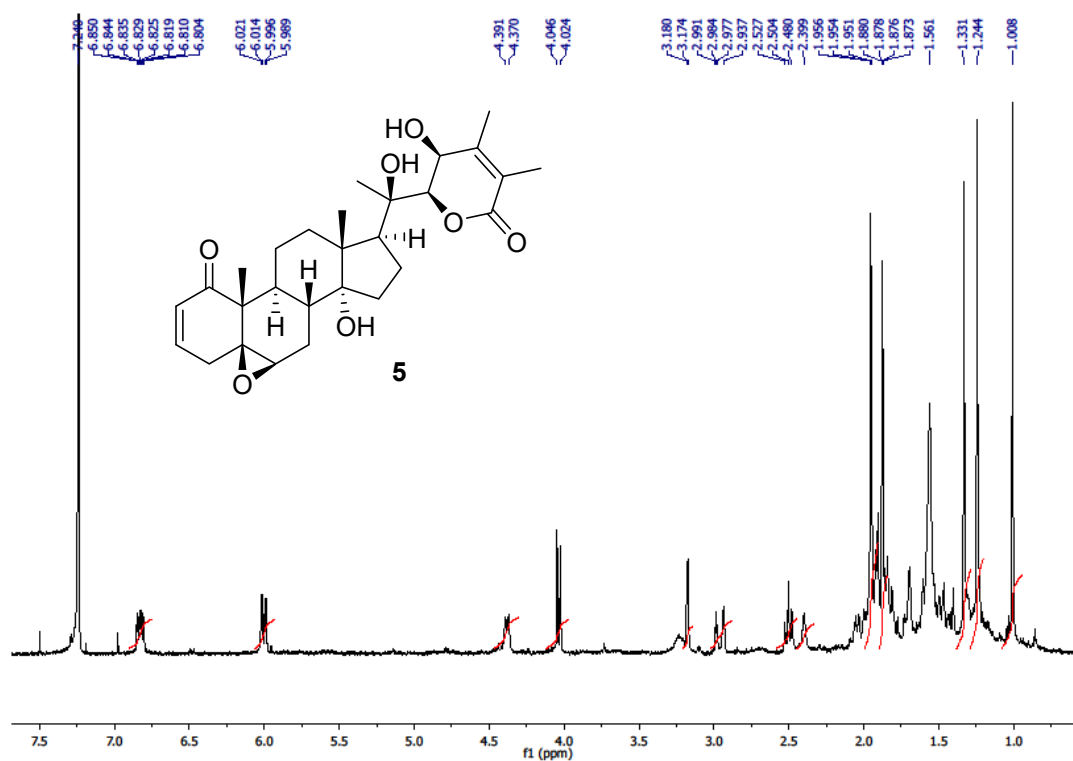

Figure S22. <sup>13</sup>C NMR Spectrum (100 MHz) of 17-Deoxy-23β-hydroxywithanolide E (5) in CDCl<sub>3</sub>

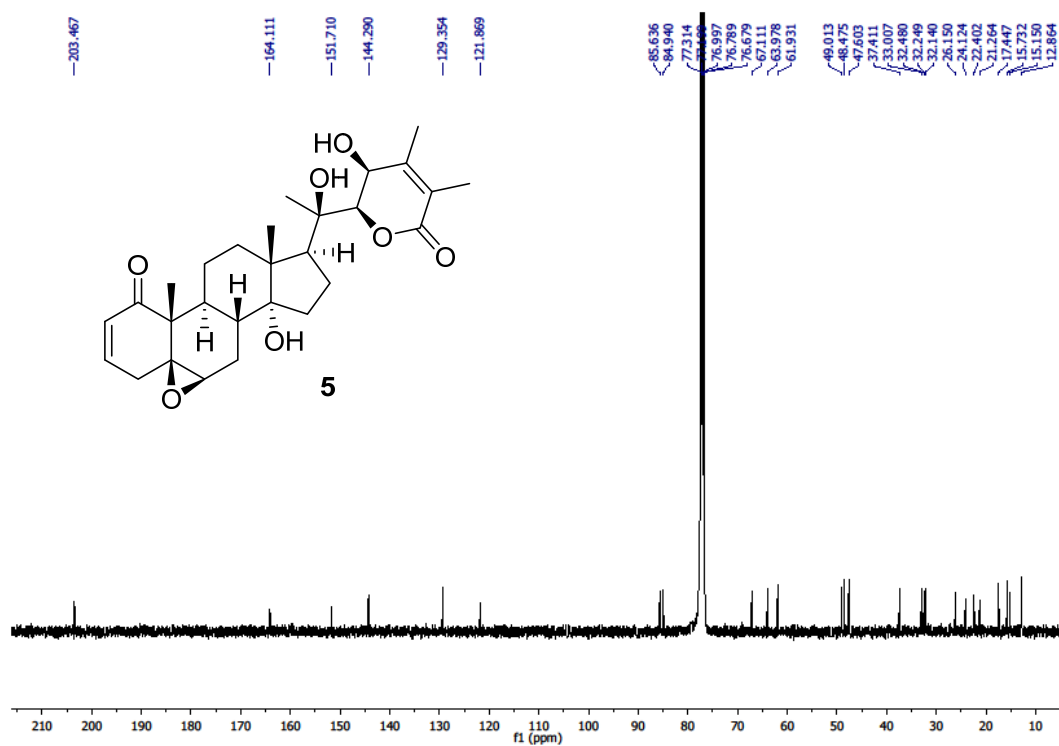

Figure S23.  $^1\text{H}$ - $^1\text{H}$  COSY Spectrum (400 MHz) of 17-Deoxy-23 $\beta$ -hydroxywithanolide E (**5**) in  $\text{CDCl}_3$

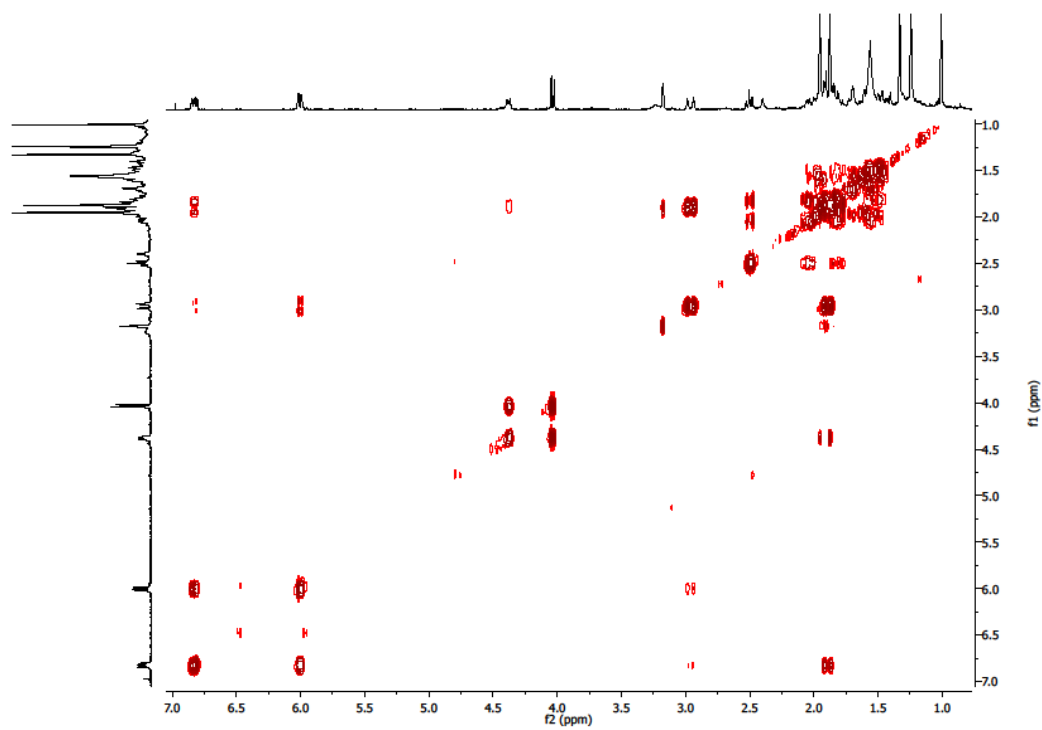

Figure S24. HSQC Spectrum (400 MHz) of 17-Deoxy-23 $\beta$ -hydroxywithanolide E (**5**) in  $\text{CDCl}_3$

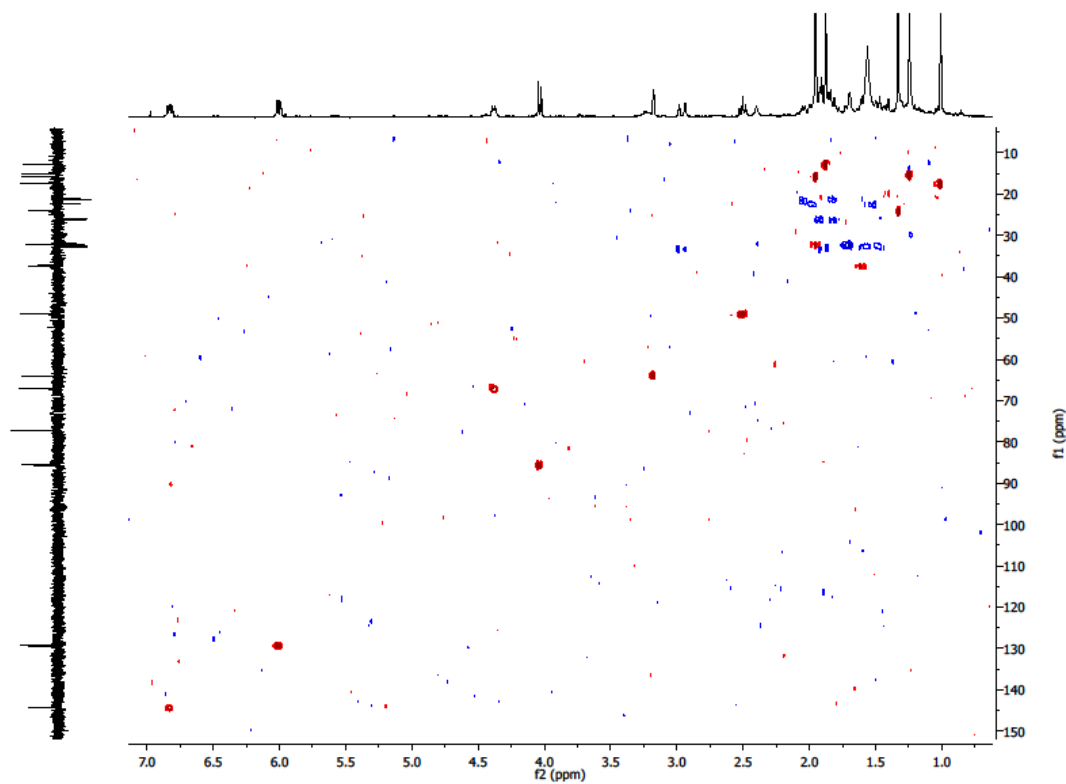

Figure S25. HMBC Spectrum (400 MHz) of 17-Deoxy-23 $\beta$ -hydroxywithanolide E (**5**) in CDCl<sub>3</sub>

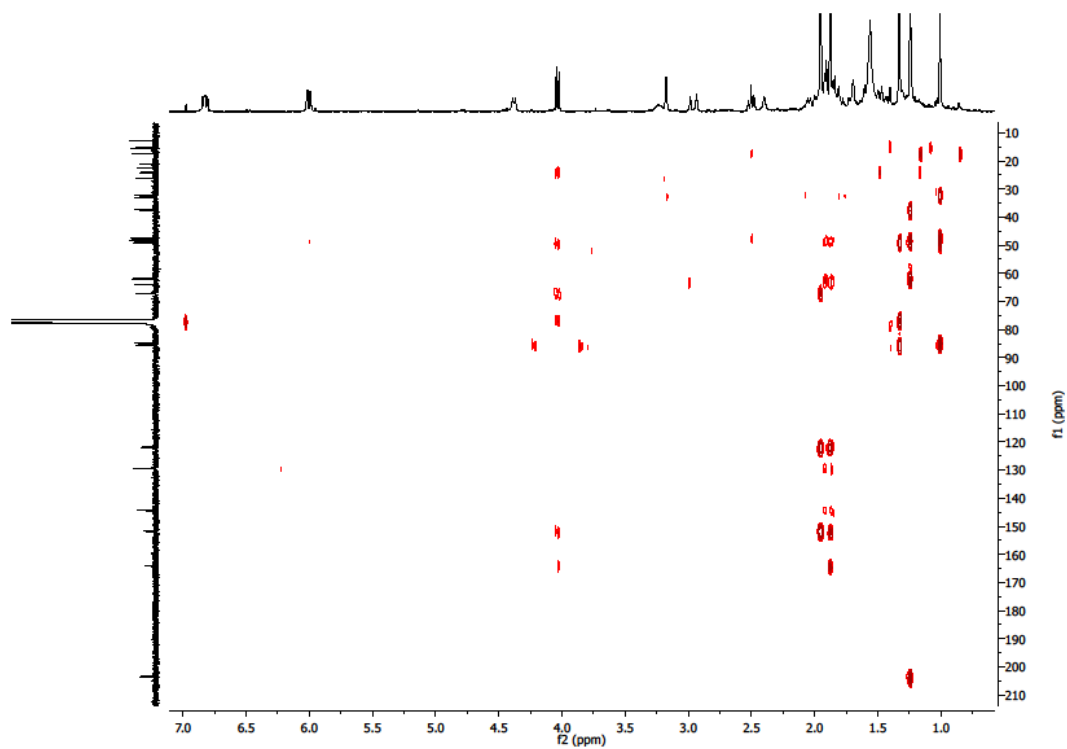

Figure S26. 1D NOESY Spectra (400 MHz) of 17-Deoxy-23 $\beta$ -hydroxywithanolide E (**5**) in CDCl<sub>3</sub>

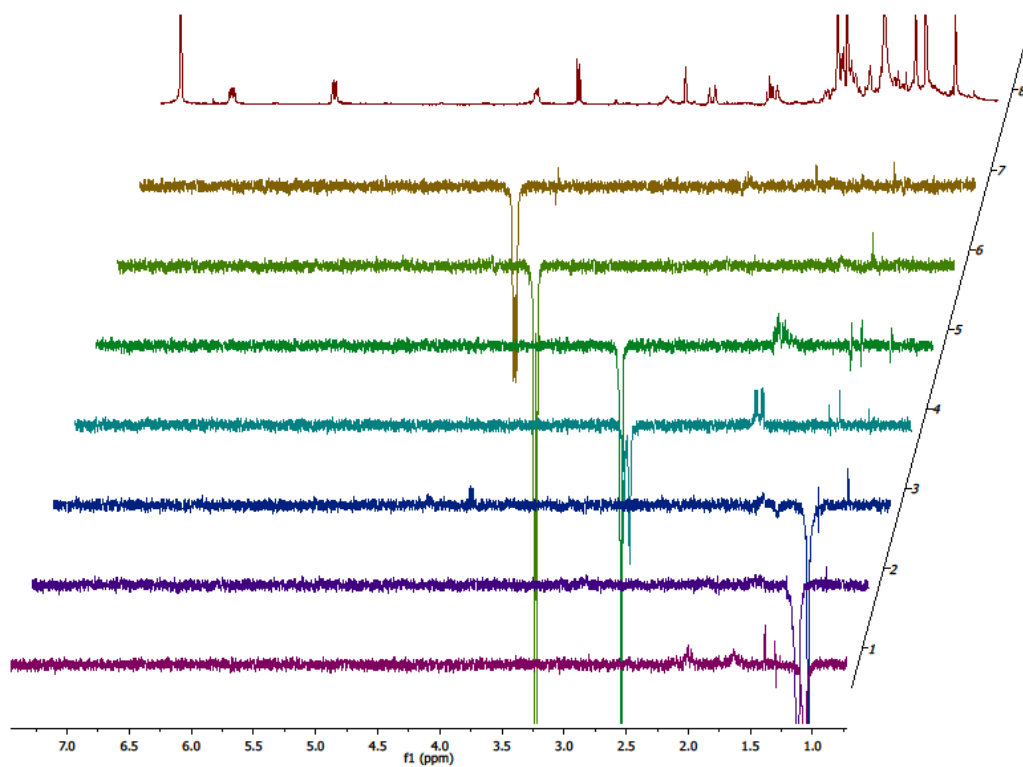



Figure S27. <sup>1</sup>H NMR Spectrum (400 MHz) of 23β-Hydroxywithanolide E (6) in CDCl<sub>3</sub>

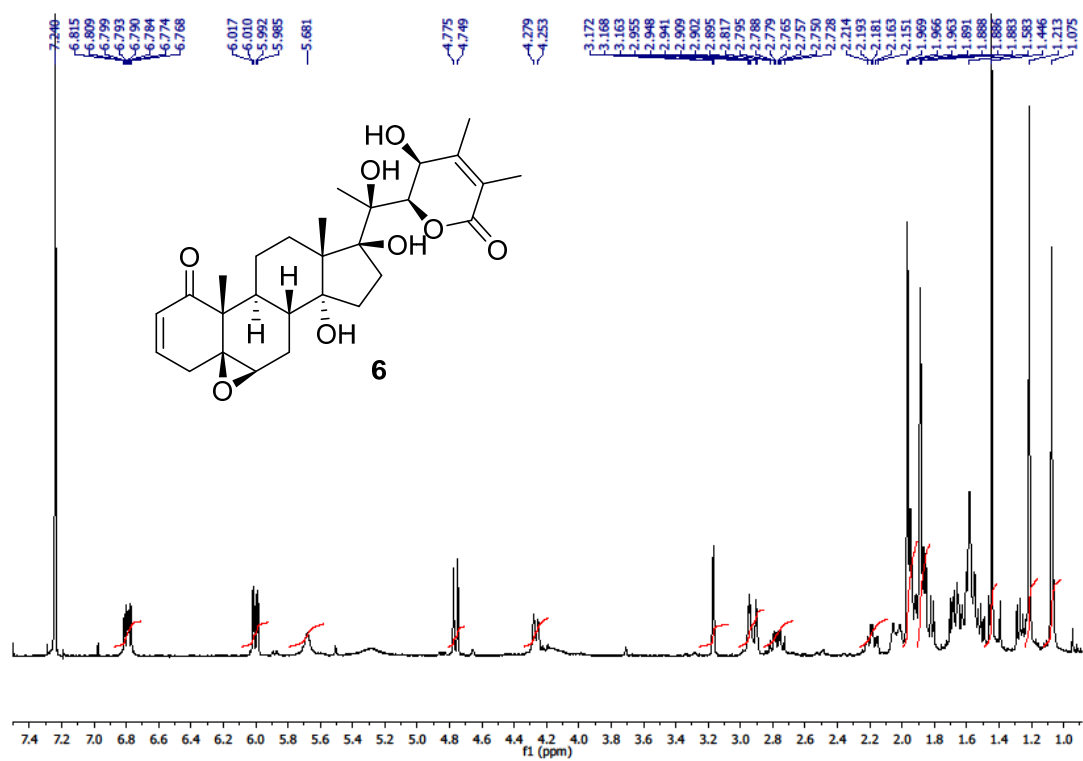

Figure S28. <sup>13</sup>C NMR Spectrum (100 MHz) of 23β-hydroxywithanolide E (6) in CDCl<sub>3</sub>

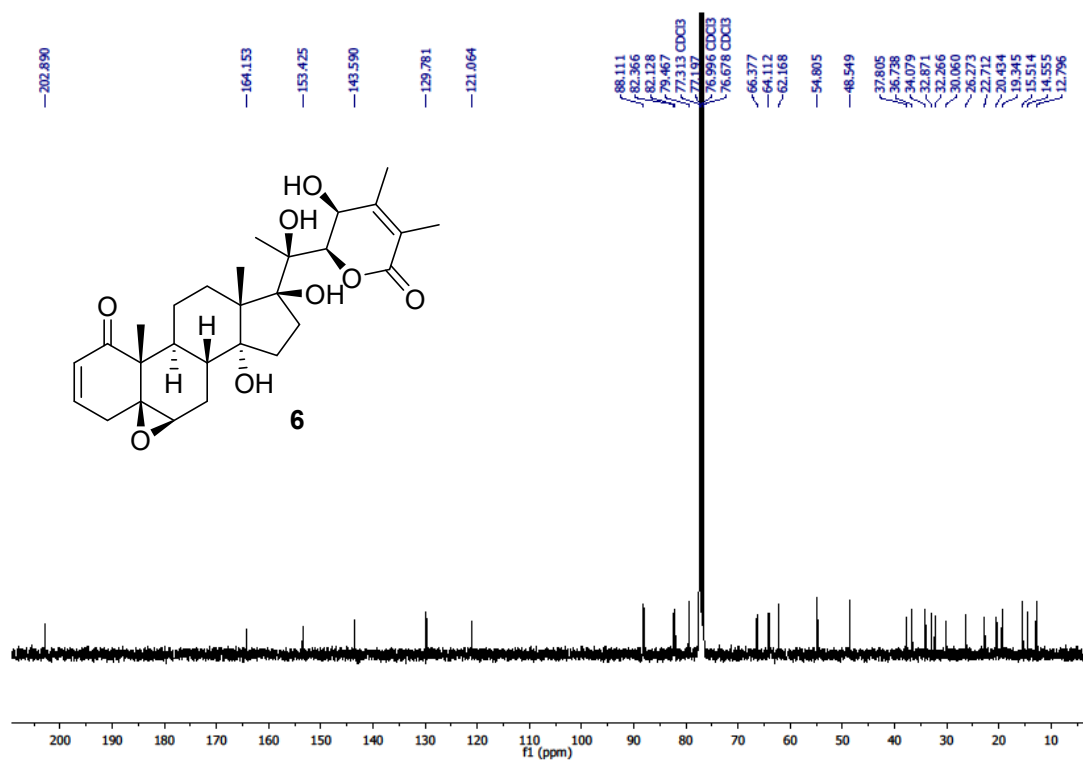

Figure S29.  $^1\text{H}$ - $^1\text{H}$  COSY Spectrum (400 MHz) of  $23\beta$ -Hydroxywithanolide E (**6**) in  $\text{CDCl}_3$

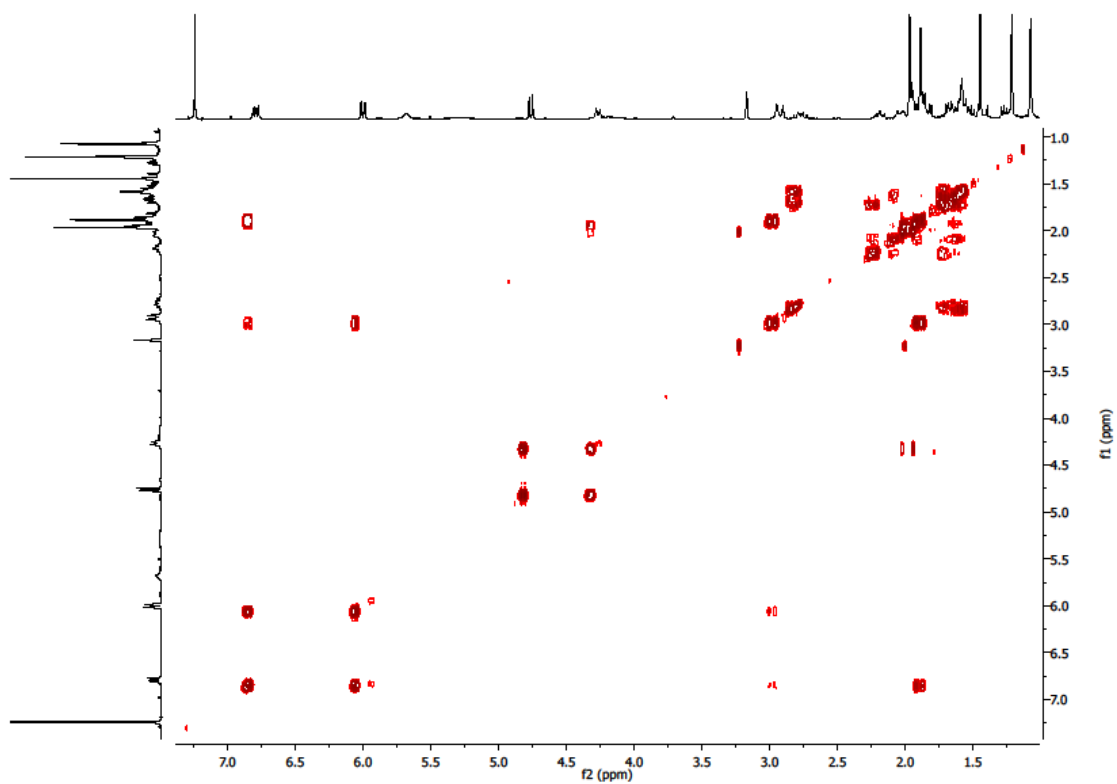

Figure S30. HSQC Spectrum (400 MHz) of  $23\beta$ -Hydroxywithanolide E (**6**) in  $\text{CDCl}_3$

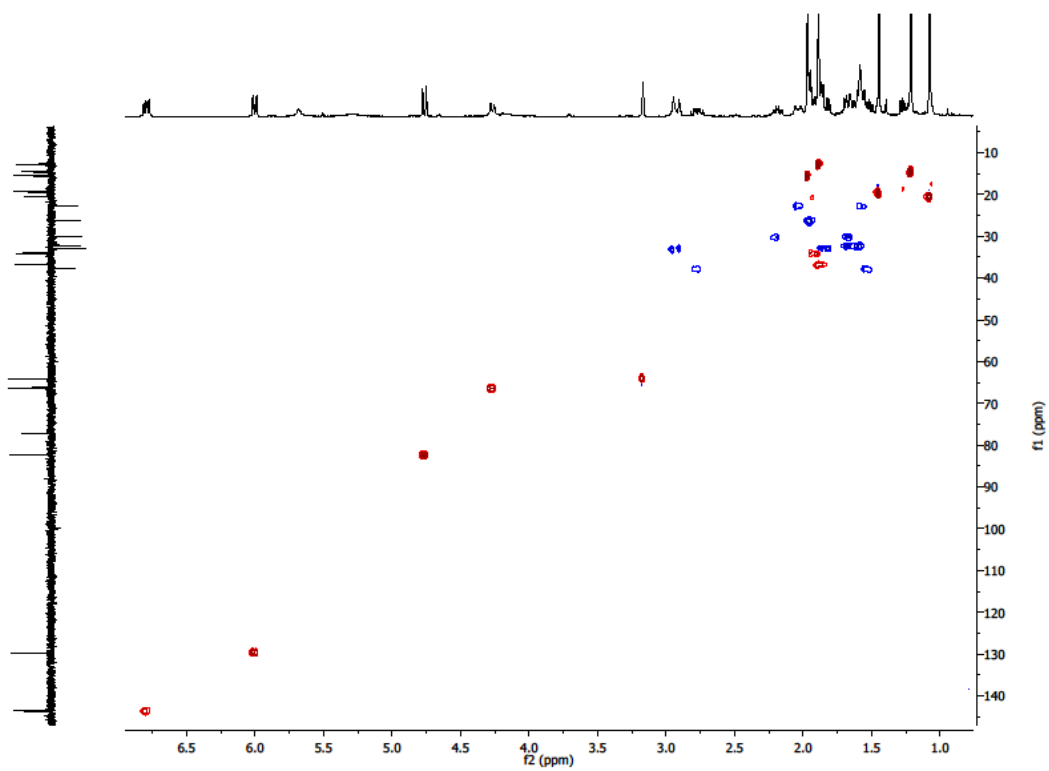

Figure S31. HMBC Spectrum (400 MHz) of 23 $\beta$ -Hydroxywithanolide E (**6**) in CDCl<sub>3</sub>

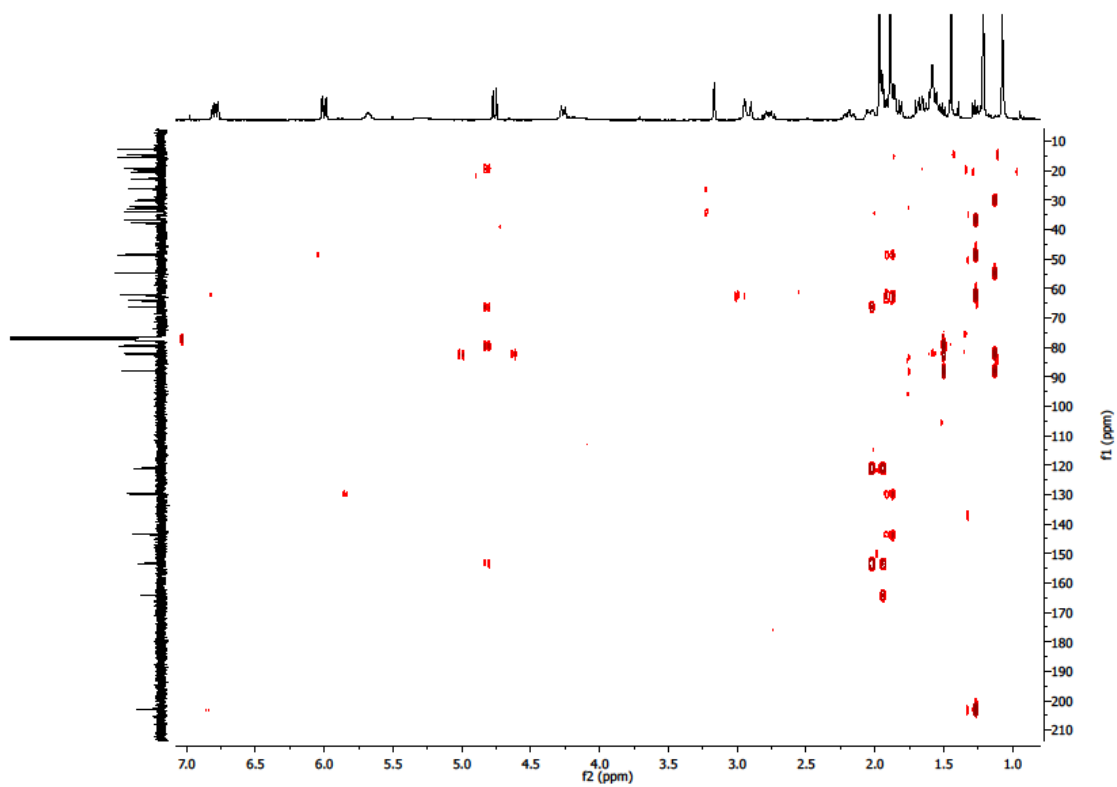

Figure S32. 1D NOESY Spectra (400 MHz) of 23 $\beta$ -Hydroxywithanolide E (**6**) in CDCl<sub>3</sub>

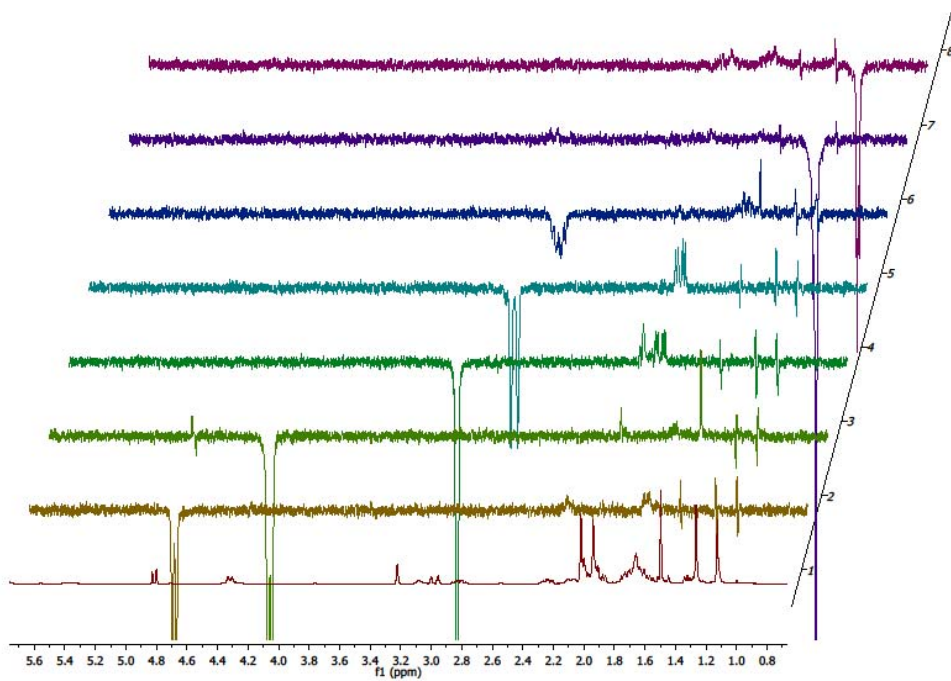

Figure S33.  $^1\text{H}$  NMR Spectrum (400 MHz) of 4-Deoxyhyperunolide A (**7**) in  $\text{CDCl}_3$

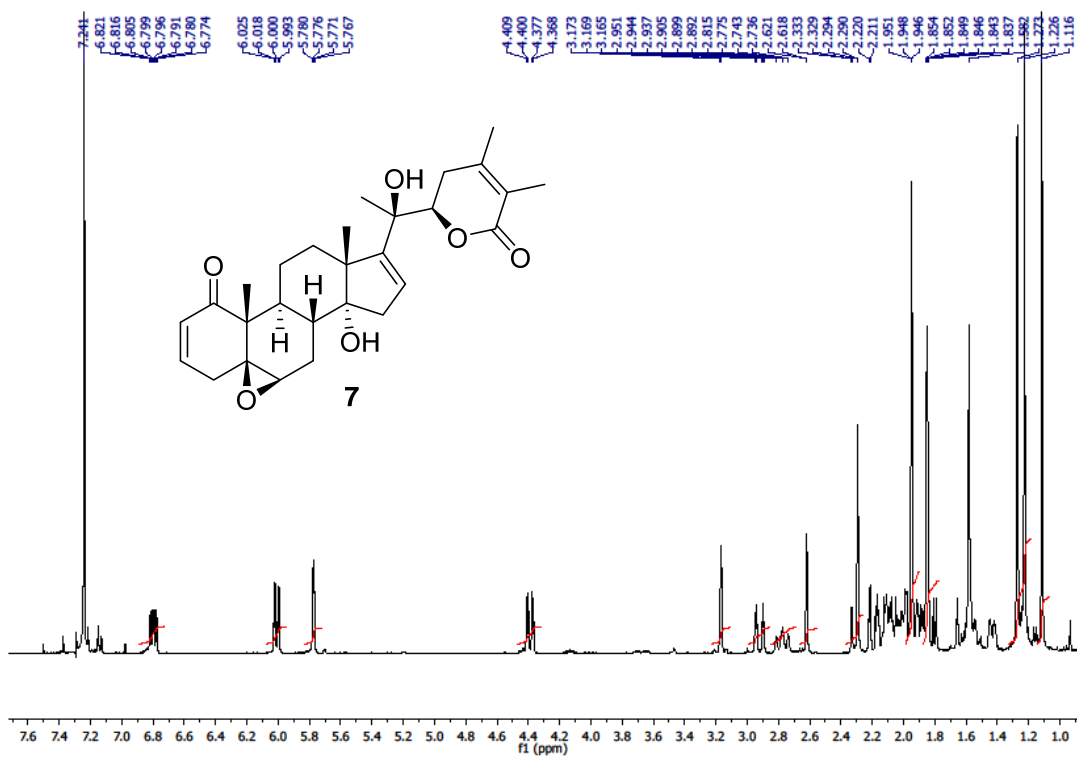

Figure S34.  $^{13}\text{C}$  NMR Spectrum (100 MHz) of 4-Deoxyhyperunolide A (**7**) in  $\text{CDCl}_3$

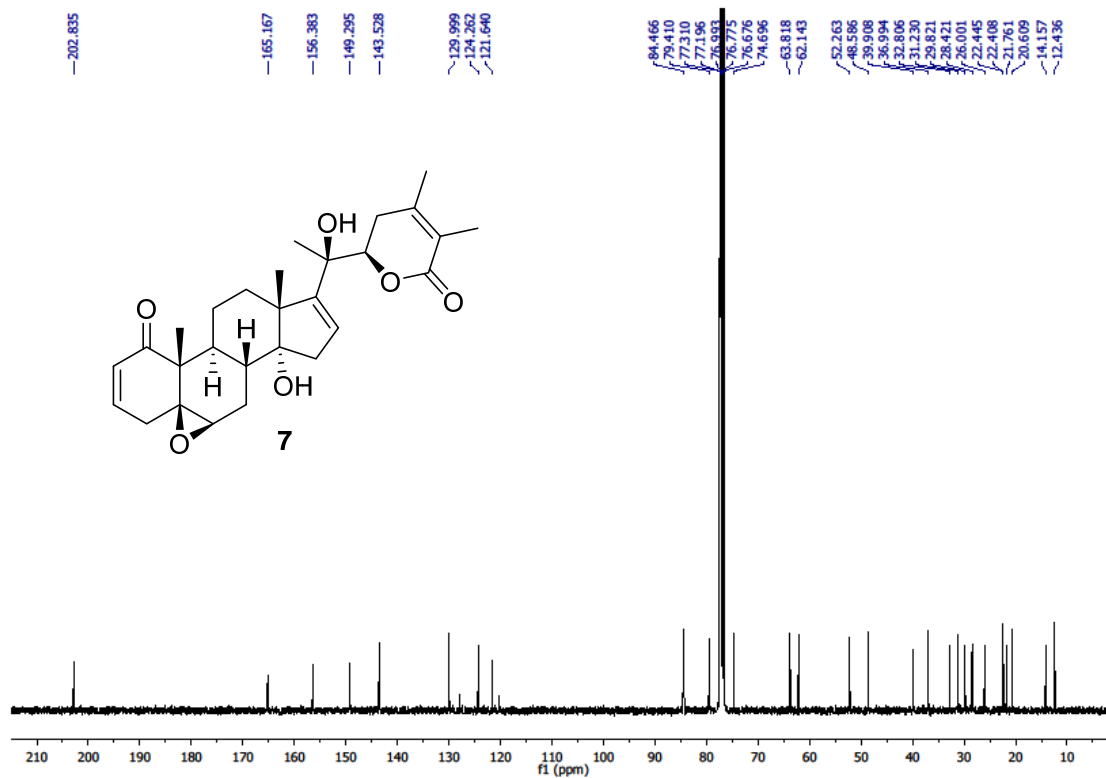

Figure S35. HSQC Spectrum (400 MHz) of 4-Deoxyhyperunolide A (7) in CDCl<sub>3</sub>

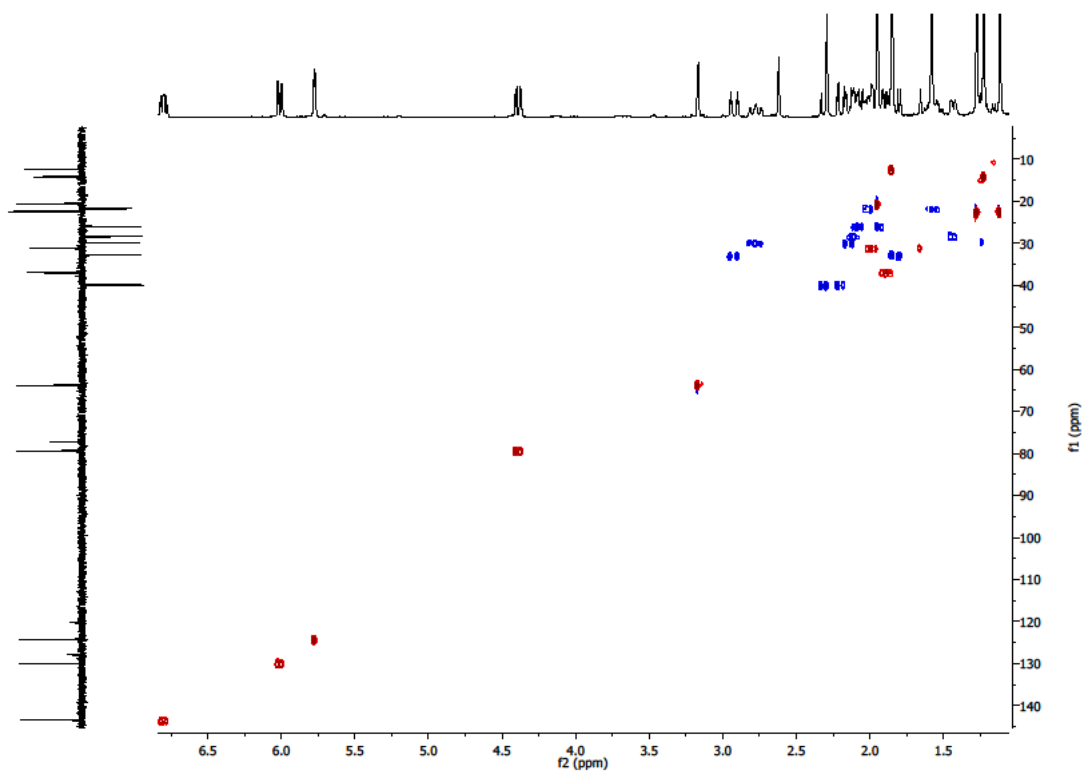

Figure S36. HMBC Spectrum (400 MHz) of 4-Deoxyhyperunolide A (7) in CDCl<sub>3</sub>

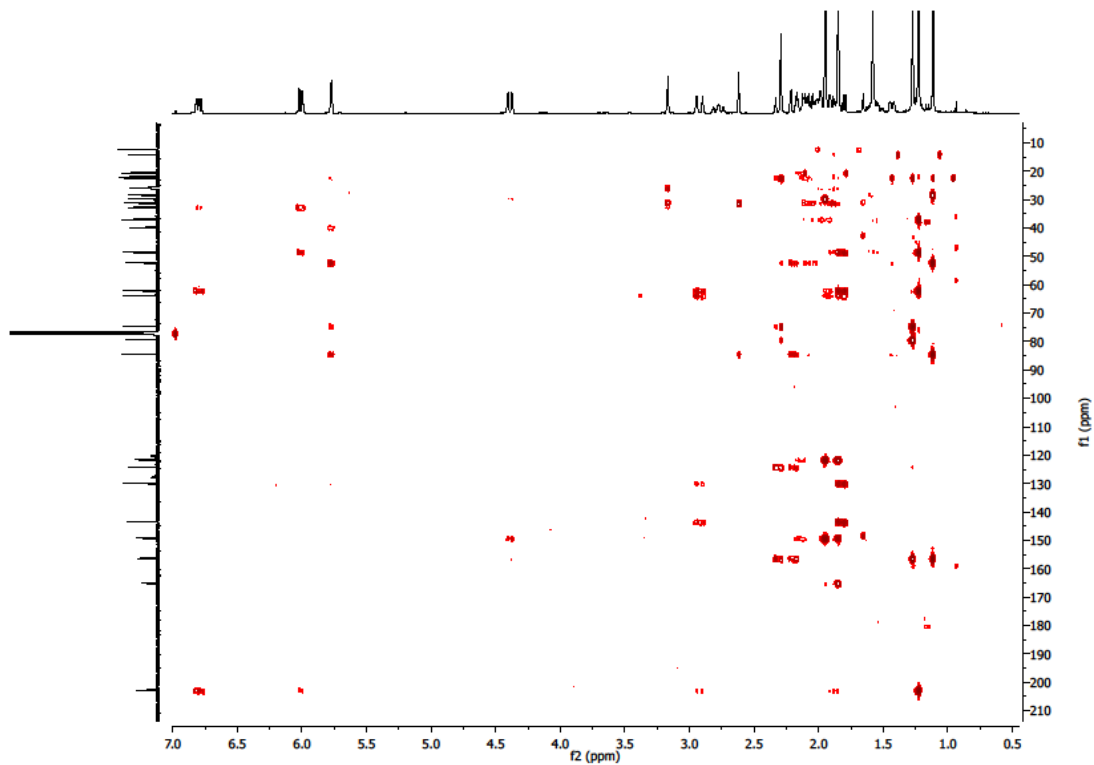

Figure S37. NOESY Spectrum (400 MHz) of 4-Deoxyhyperunolide A (7) in CDCl<sub>3</sub>

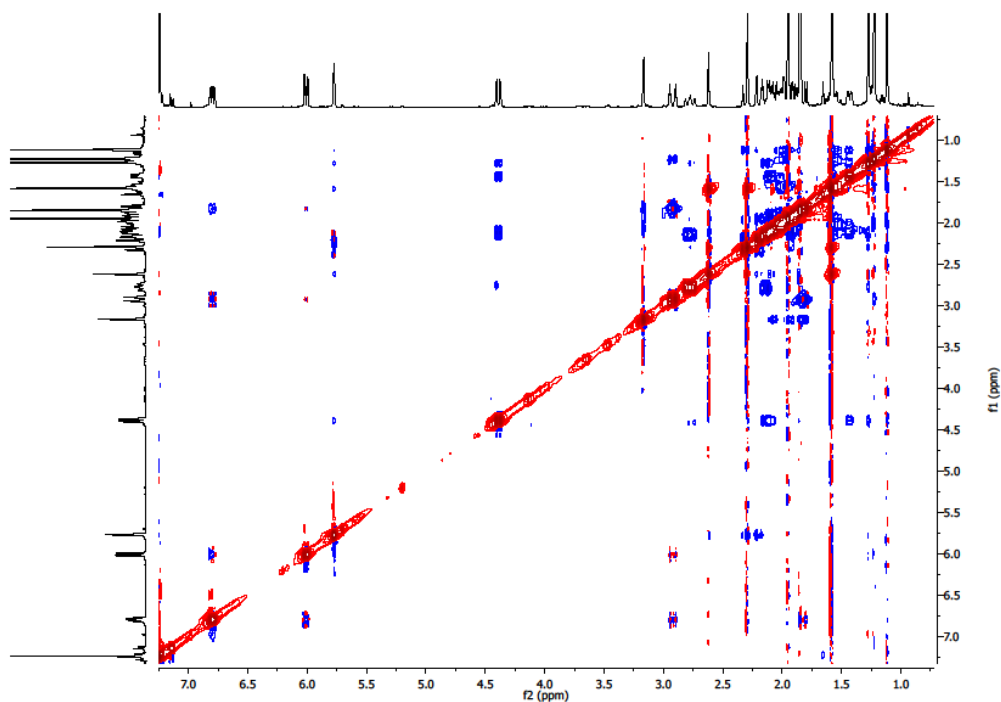

Figure S38. <sup>1</sup>H NMR Spectrum (400 MHz) of 7β-Hydroxywithanolide F (8) in CDCl<sub>3</sub>

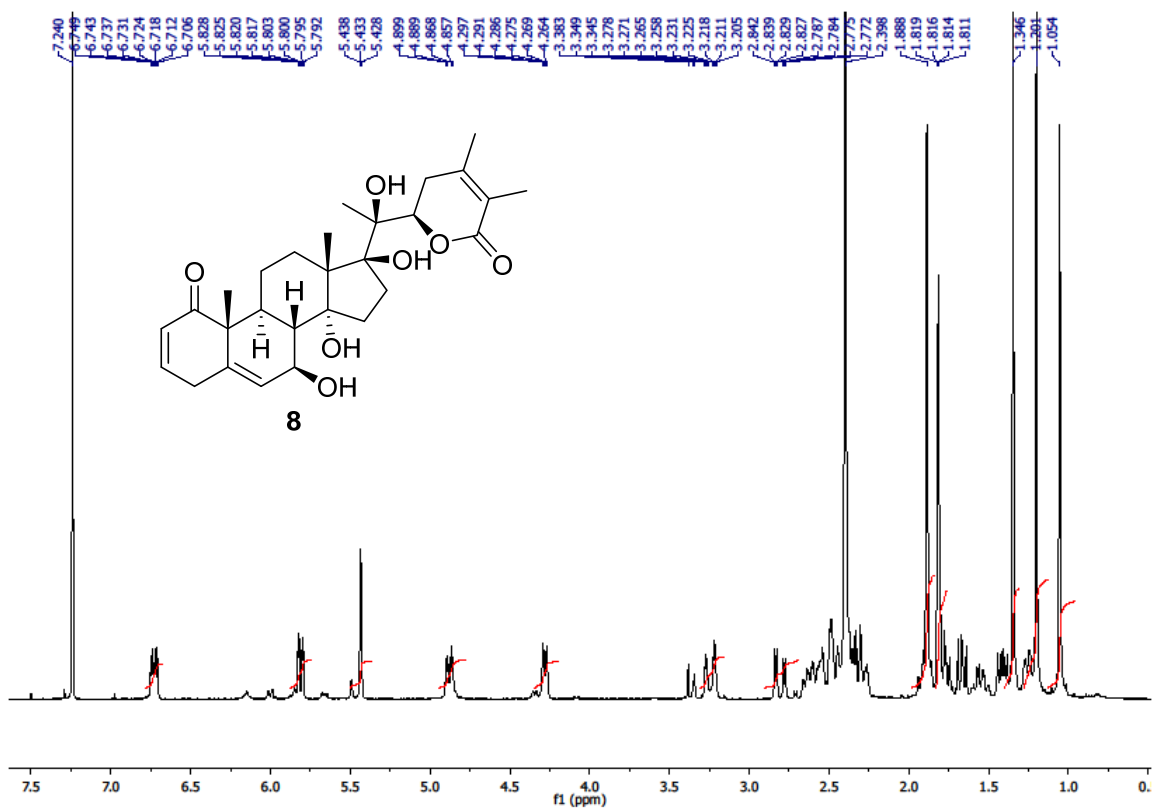

Figure S39. <sup>13</sup>C NMR Spectrum (100 MHz) of 7β-Hydroxywithanolide F (8) in CDCl<sub>3</sub>

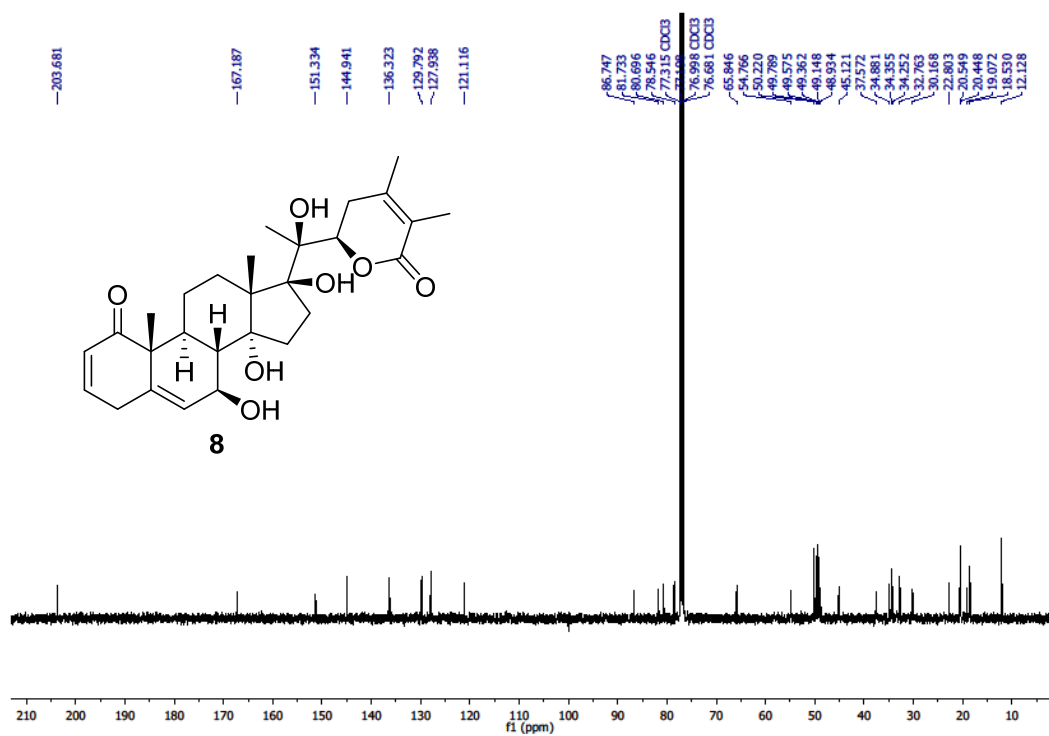

Figure S40. HSQC Spectrum (400 MHz) of 7β-Hydroxywithanolide F (8) in CDCl<sub>3</sub>

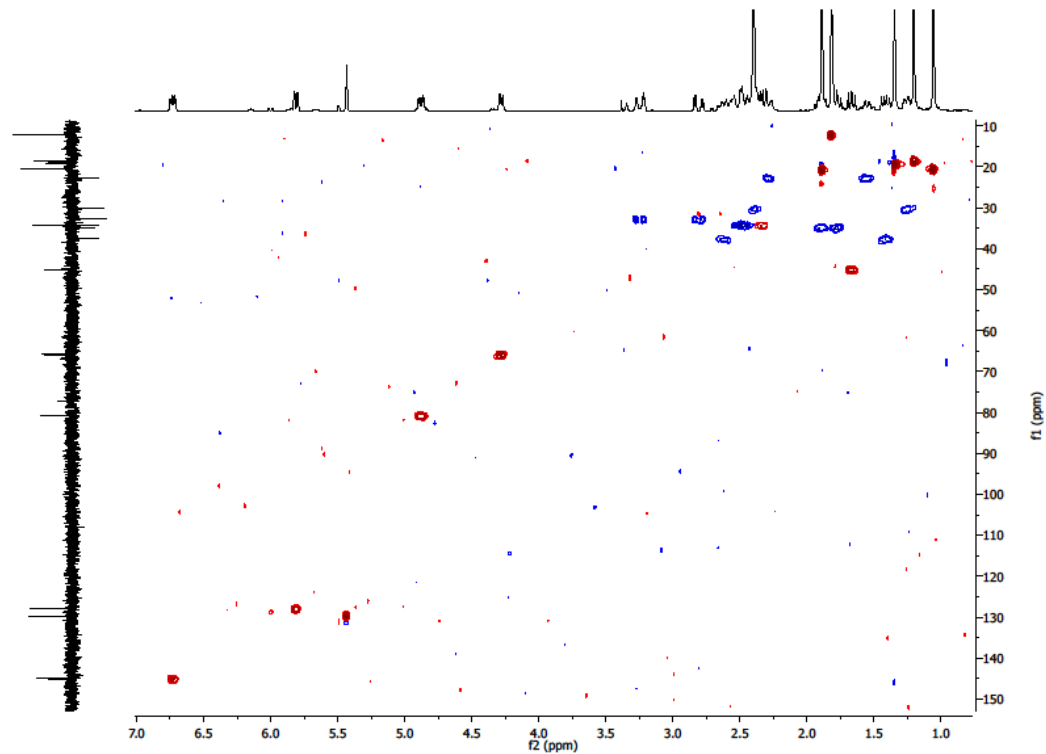

Figure S41. HMBC Spectrum (400 MHz) of 7 $\beta$ -Hydroxywithanolide F (**8**) in CDCl<sub>3</sub>

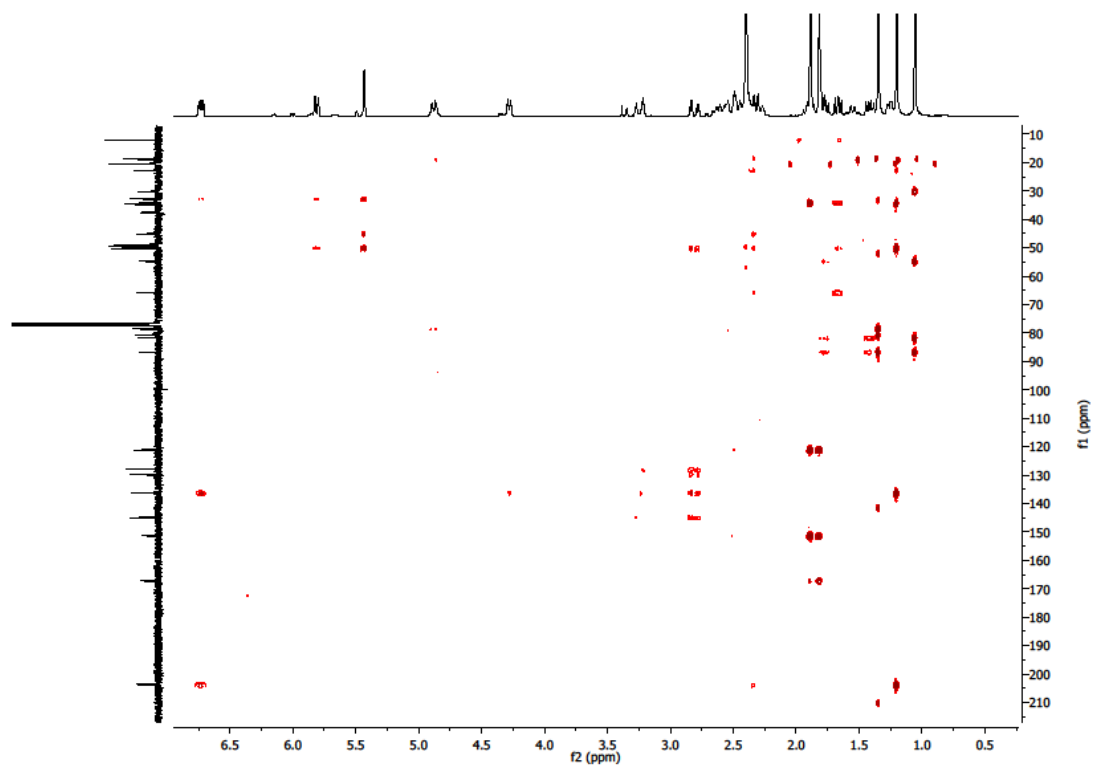

Figure S42. 1D NOESY spectra (400 MHz) of 7 $\beta$ -Hydroxywithanolide F (**8**) in CDCl<sub>3</sub>

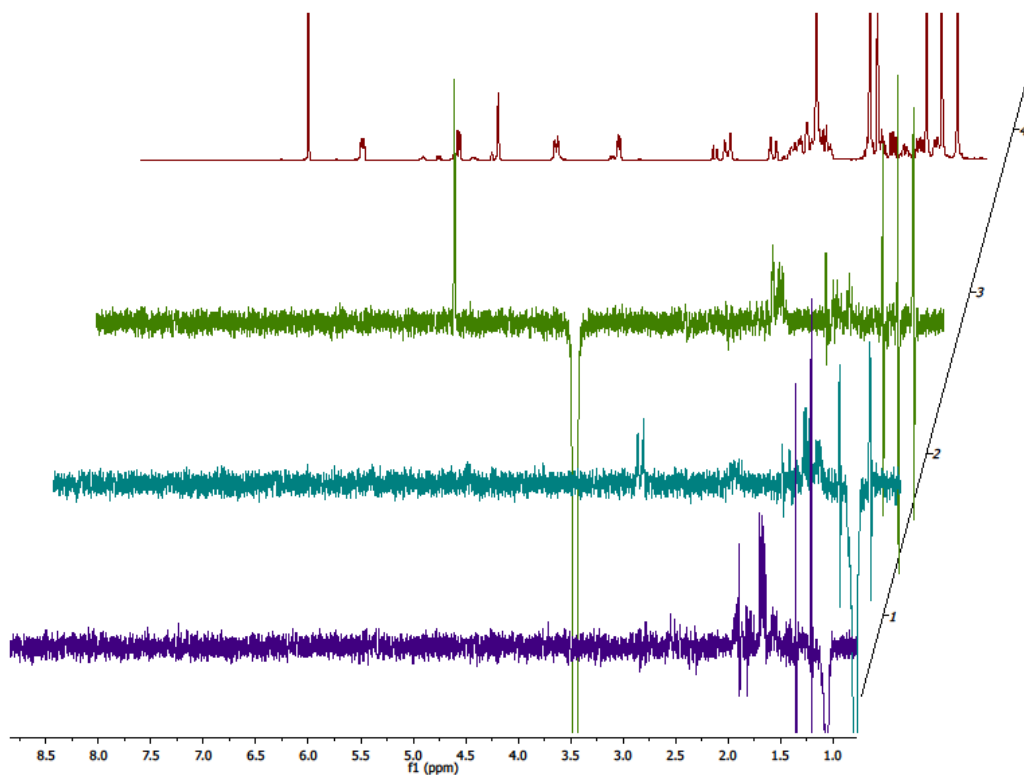



Figure S43. <sup>1</sup>H NMR Spectrum (400 MHz) of 7β-Hydroxy-17-*epi*-withanolide K (9) in CDCl<sub>3</sub>

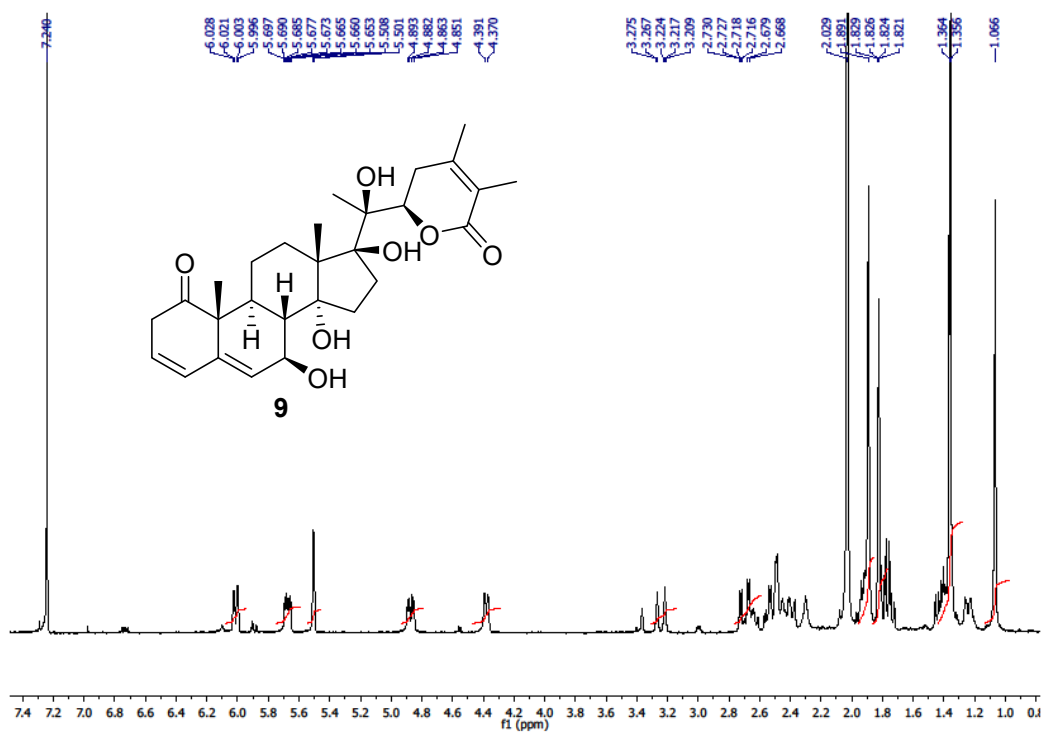

Figure S44. <sup>13</sup>C NMR Spectrum (100 MHz) of 7β-Hydroxy-17-*epi*-withanolide K (9) in CDCl<sub>3</sub>

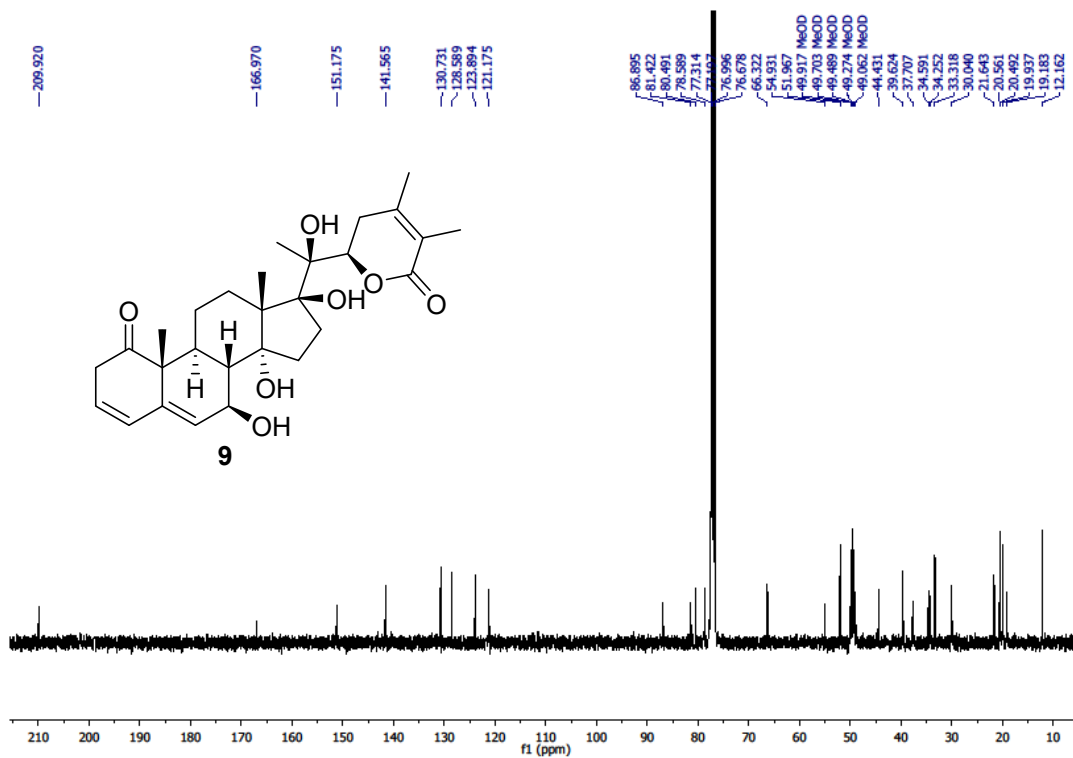

Figure S45. HSQC Spectrum (400 MHz) of 7 $\beta$ -Hydroxy-17-*epi*-withanolide K (9) in CDCl<sub>3</sub>

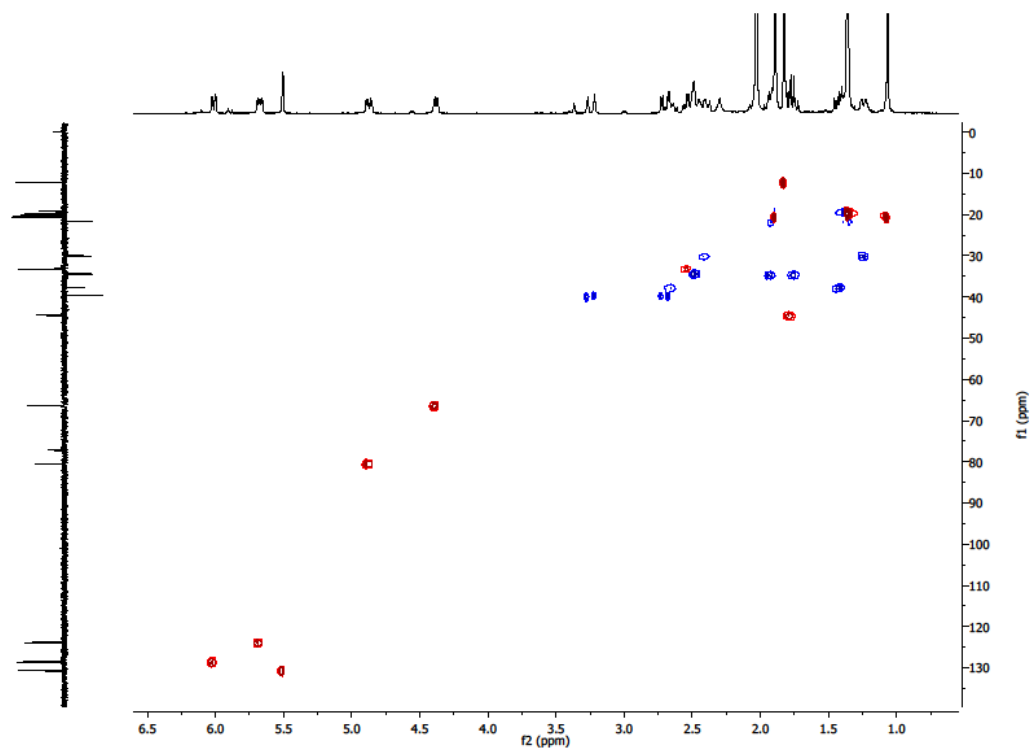

Figure S46. HMBC Spectrum (400 MHz) of 7 $\beta$ -Hydroxy-17-*epi*-withanolide K (9) in CDCl<sub>3</sub>

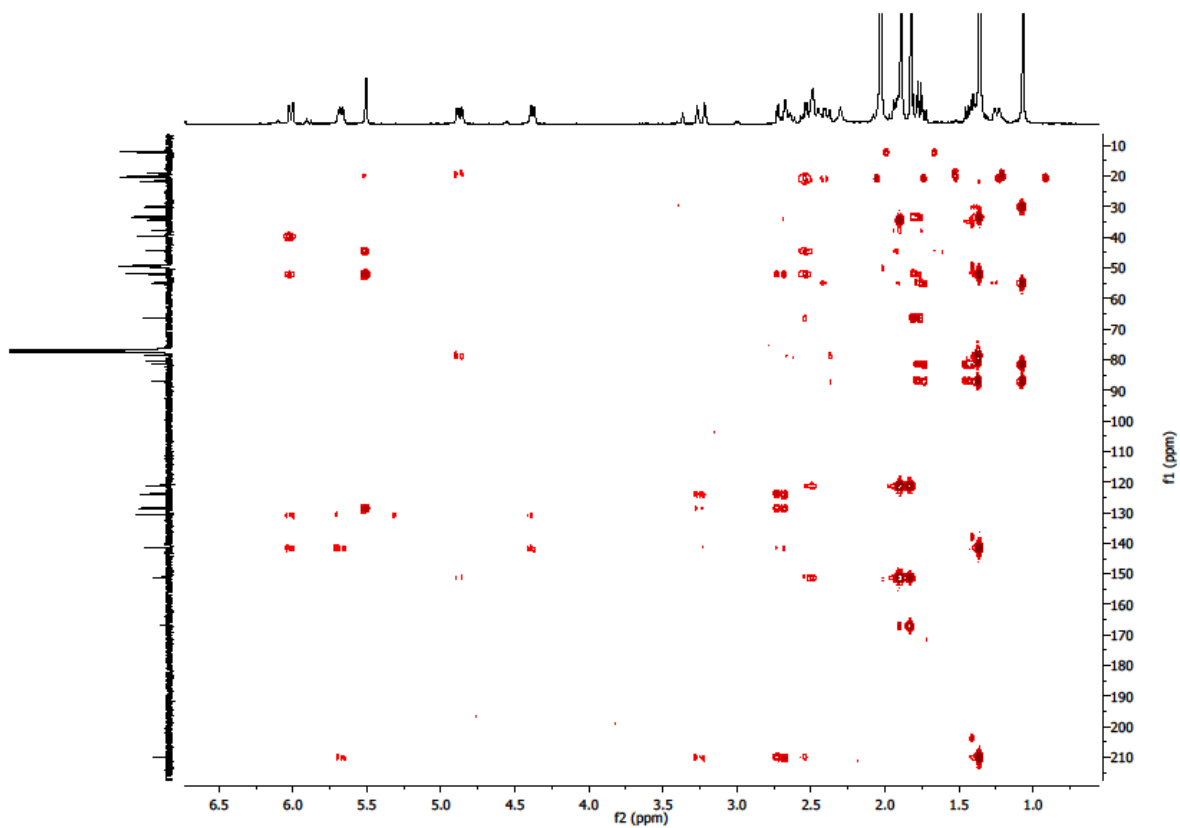

Figure S47. 1D NOESY Spectra (400 MHz) of 7 $\beta$ -Hydroxy-17-*epi*-withanolide K (**9**) in CDCl<sub>3</sub>

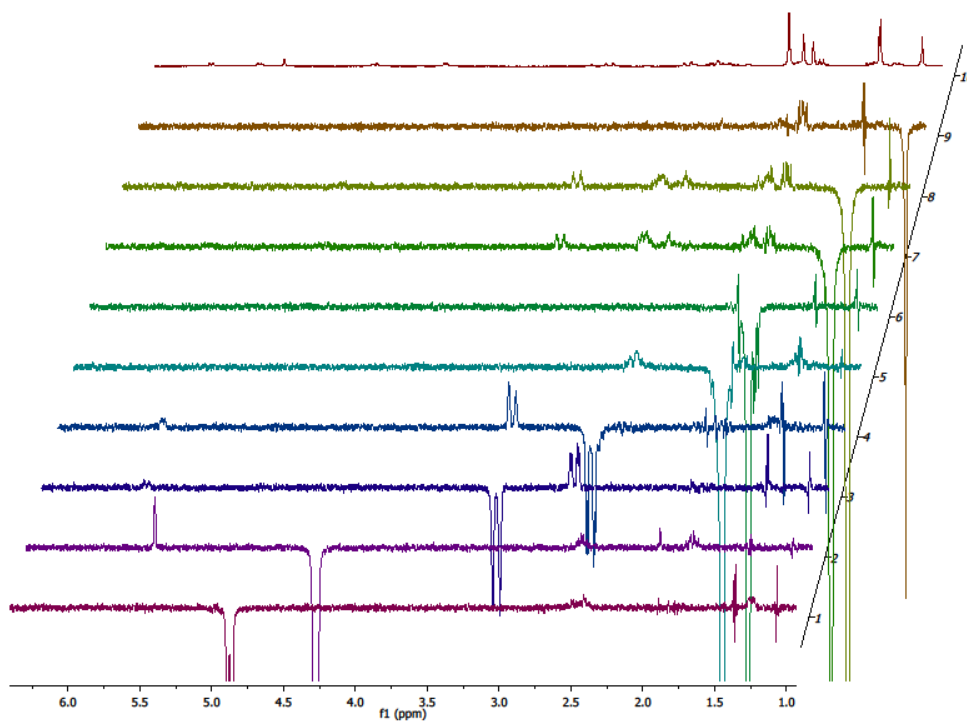

Figure S48. <sup>1</sup>H NMR Spectrum (400 MHz) of 24,25-Dihydro-23 $\beta$ ,28-dihydroxywithanolide G (**10**) in CDCl<sub>3</sub>

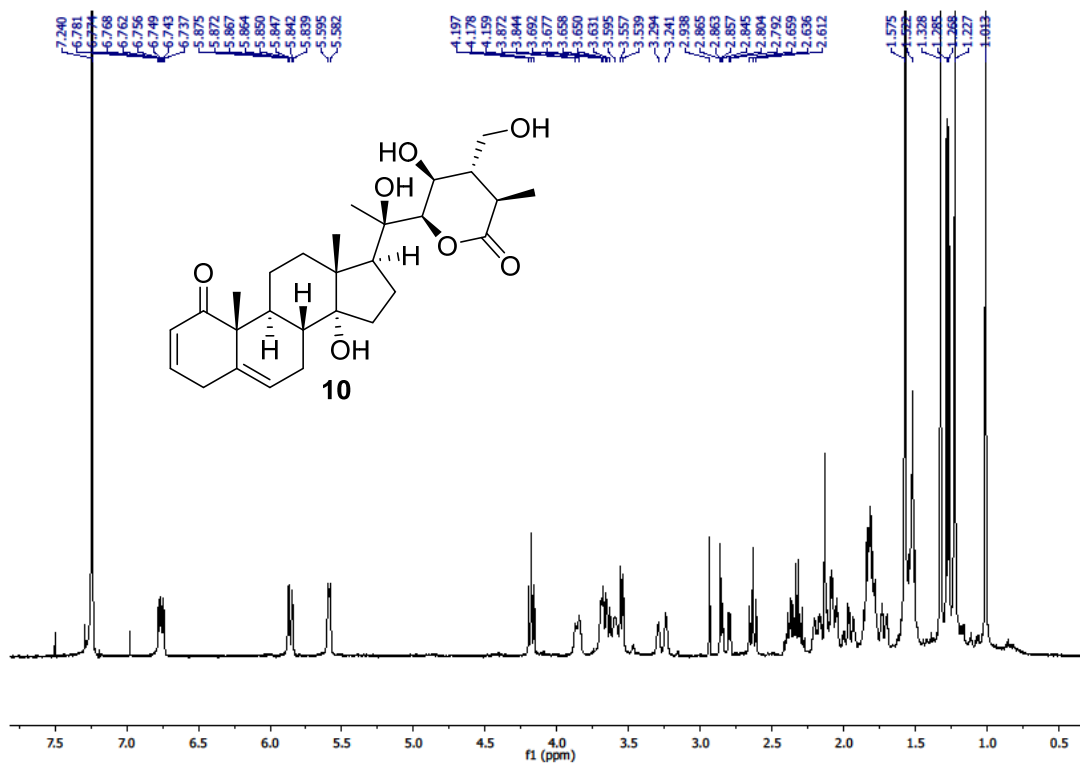

Figure S49.  $^{13}\text{C}$  NMR Spectrum (100 MHz) of 24,25-Dihydro-23 $\beta$ ,28-dihydroxywithanolide G (**10**) in  $\text{CDCl}_3$

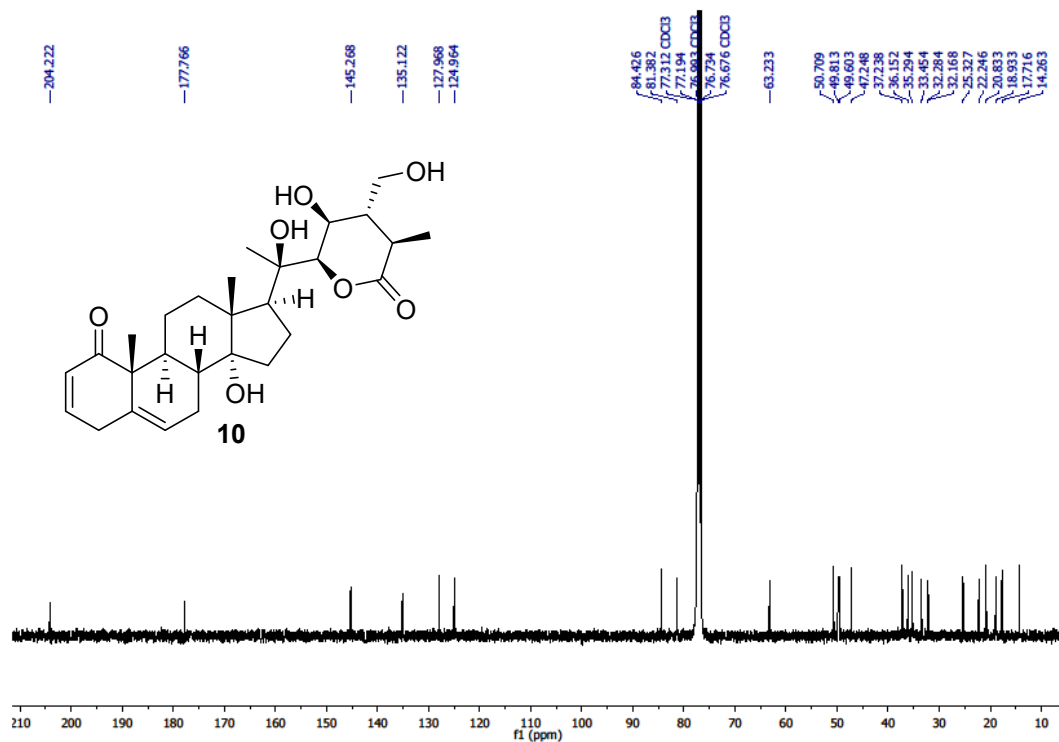

Figure S50.  $^1\text{H}$ - $^1\text{H}$  COSY Spectrum (400 MHz) of 24,25-Dihydro-23 $\beta$ ,28-dihydroxywithanolide G (**10**) in  $\text{CDCl}_3$

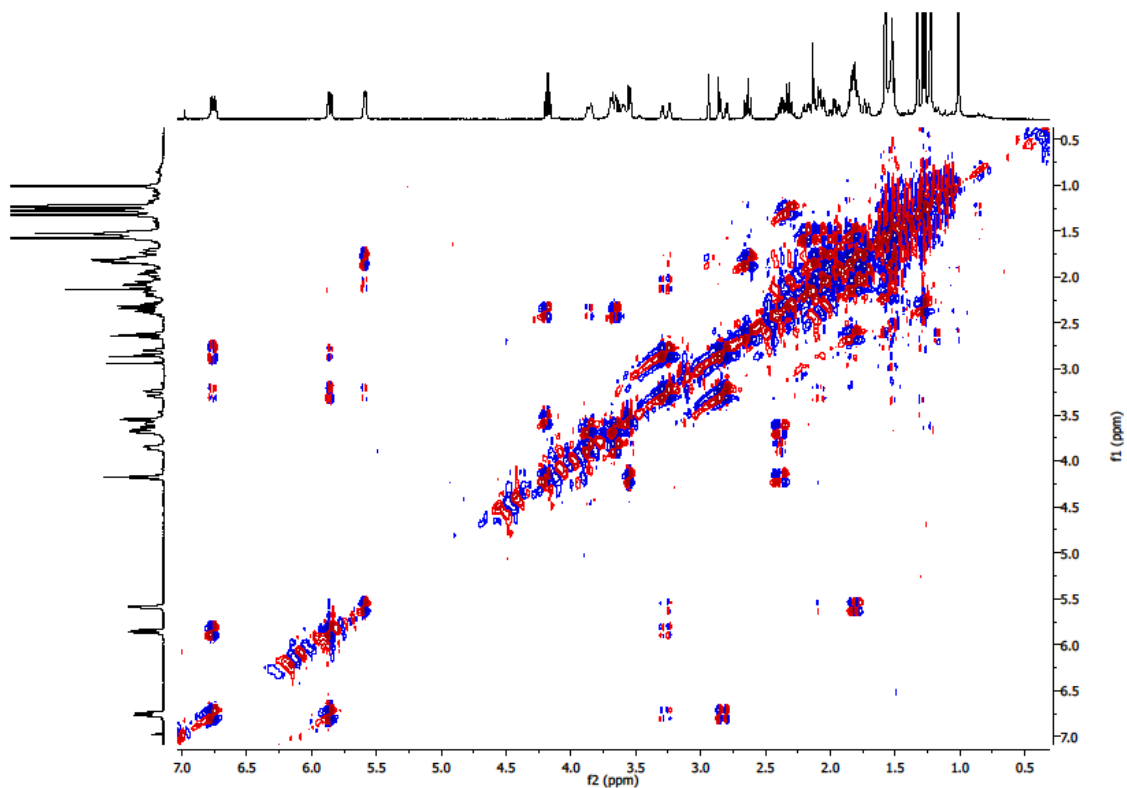

Figure S51. HSQC Spectrum (400 MHz) of 24,25-Dihydro-23 $\beta$ ,28-dihydroxywithanolide G (**10**) in CDCl<sub>3</sub>

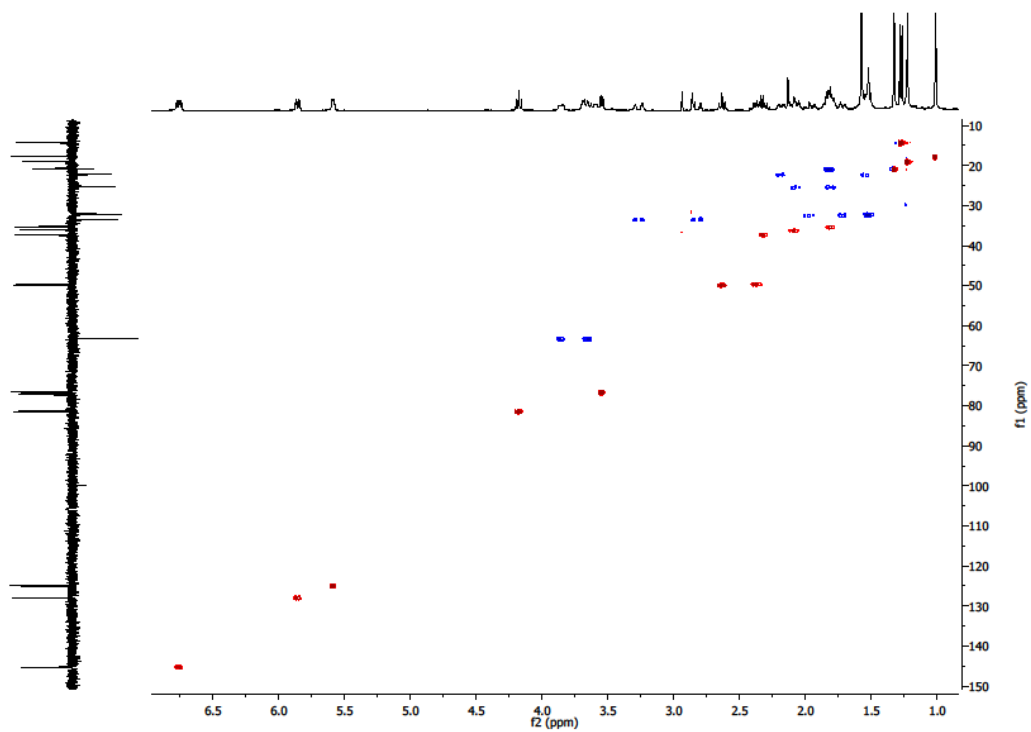

Figure S52. HMBC Spectrum (400 MHz) of 24,25-Dihydro-23 $\beta$ ,28-dihydroxywithanolide G (**10**) in CDCl<sub>3</sub>

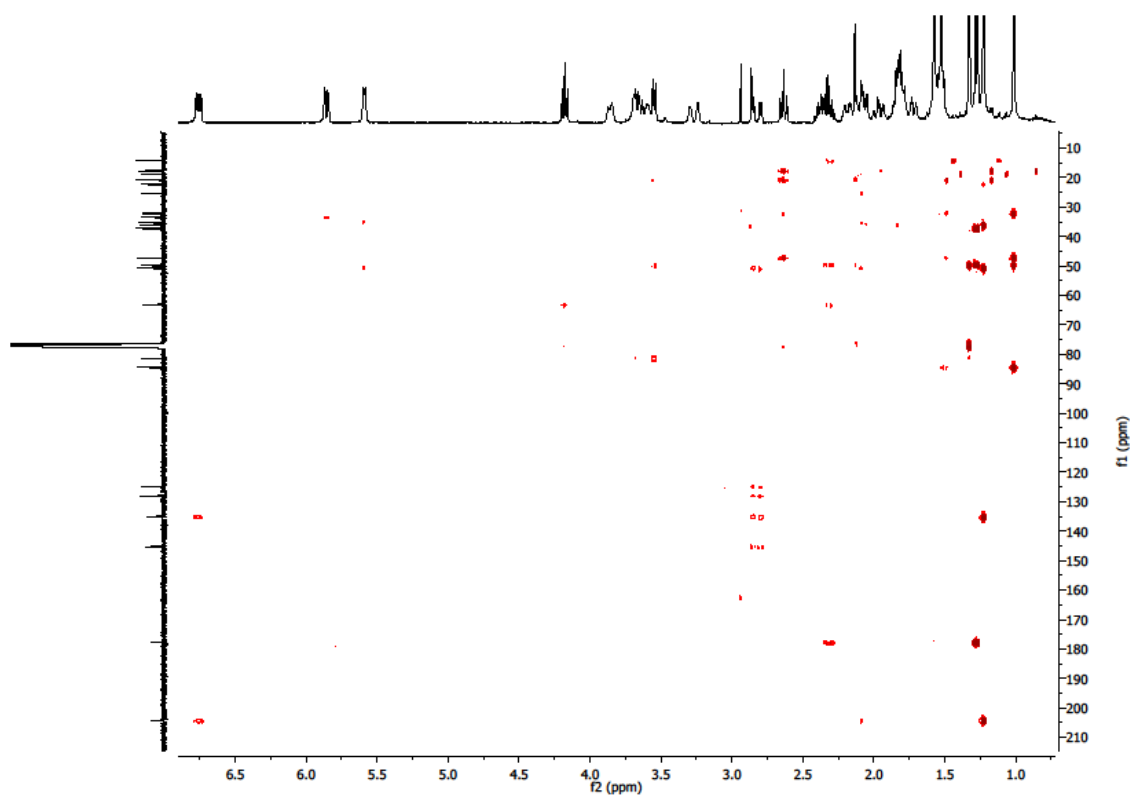

Figure S53. 1D NOESY Spectra (400 MHz) of 24,25-Dihydro-23 $\beta$ ,28-dihydroxywithanolide G (**10**) in CDCl<sub>3</sub>

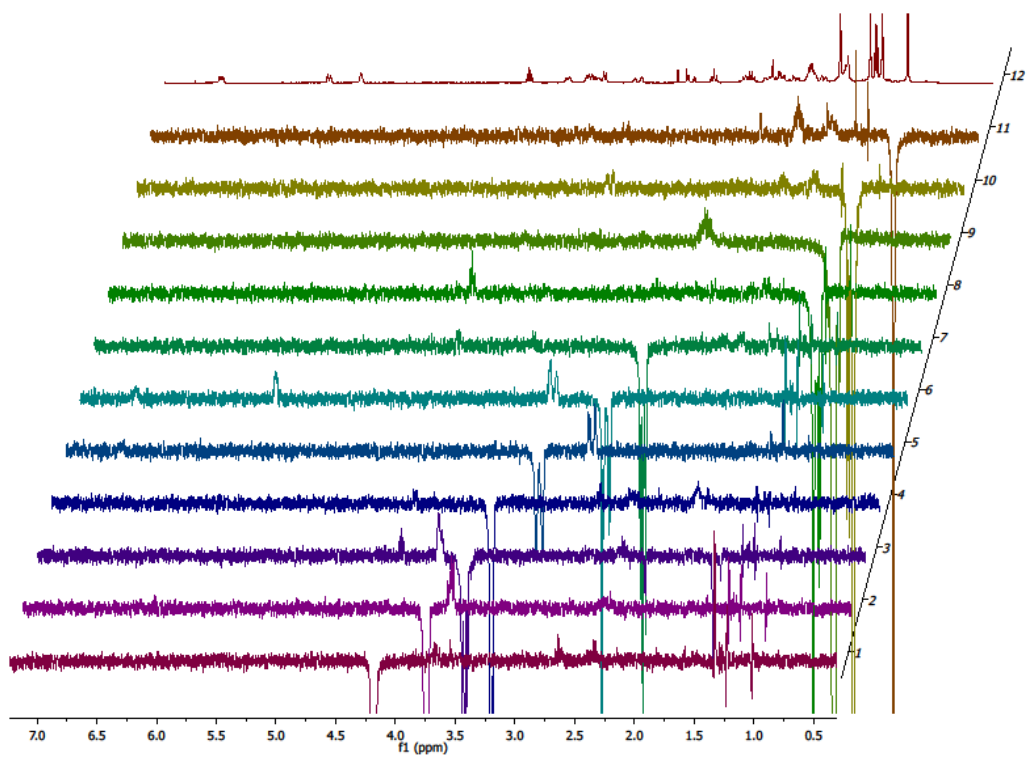

Figure S54. <sup>1</sup>H NMR Spectrum (400 MHz) of 24,25-Dihydrowithanolide E (**11**) in CDCl<sub>3</sub>

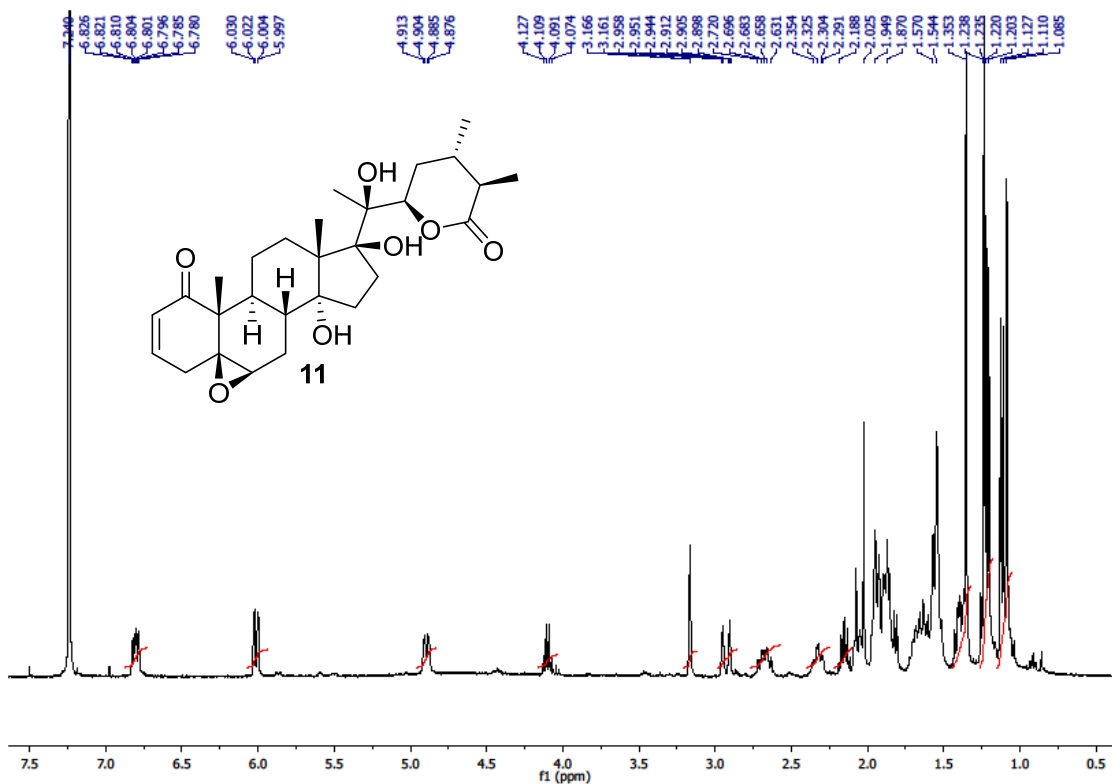

Figure S55.  $^{13}\text{C}$  NMR Spectrum (100 MHz) of 24,25-Dihydrowithanolide E (**11**) in  $\text{CDCl}_3$

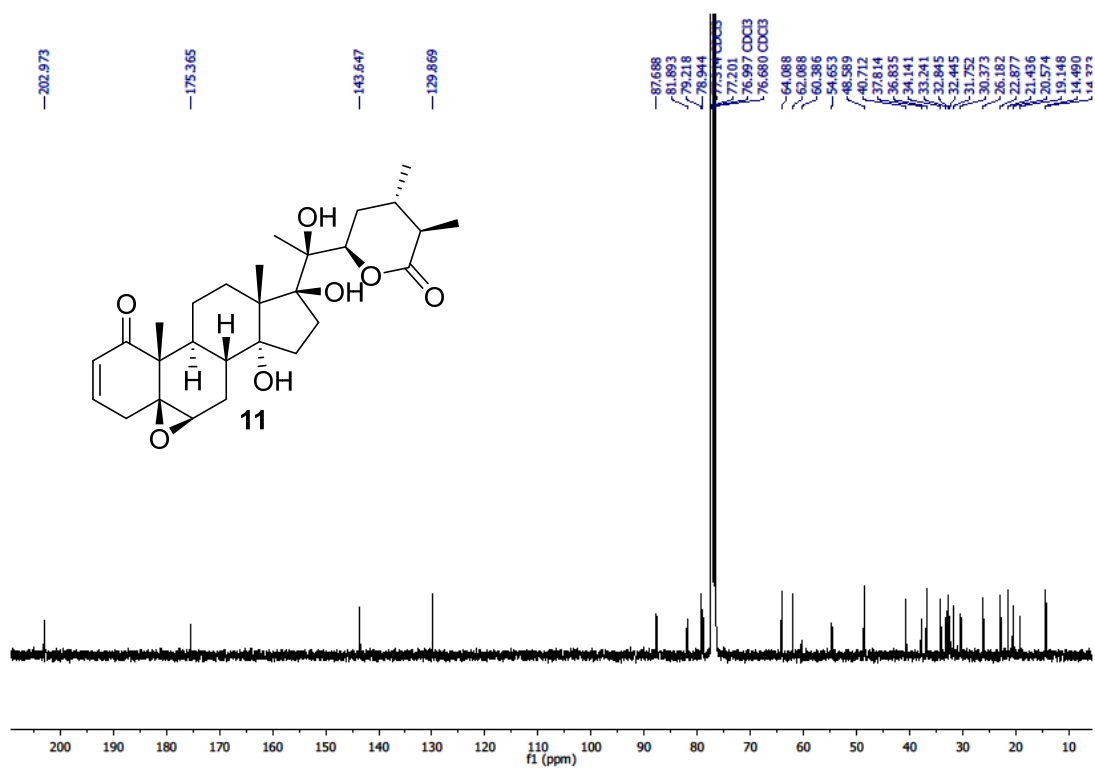

Figure S56. HSQC Spectrum (400 MHz) of 24,25-Dihydrowithanolide E (**11**) in  $\text{CDCl}_3$

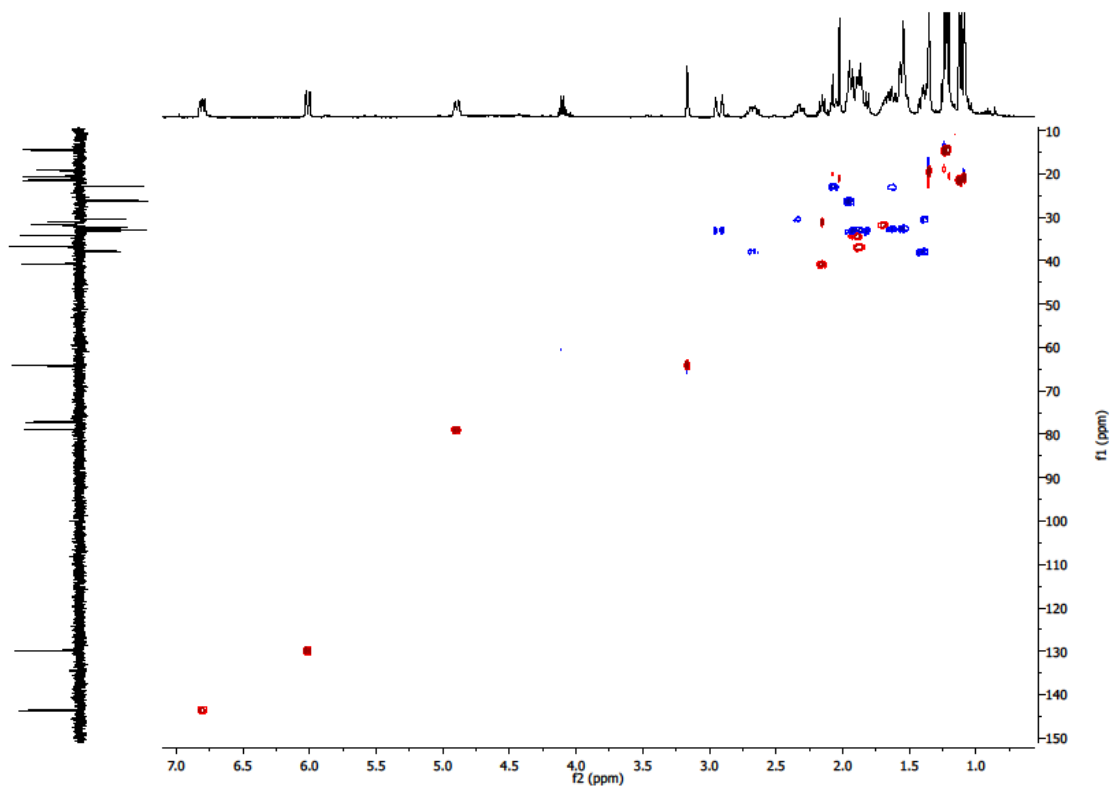

Figure S57. HMBC Spectrum (400 MHz) of 24,25-Dihydrowithanolide E (**11**) in CDCl<sub>3</sub>

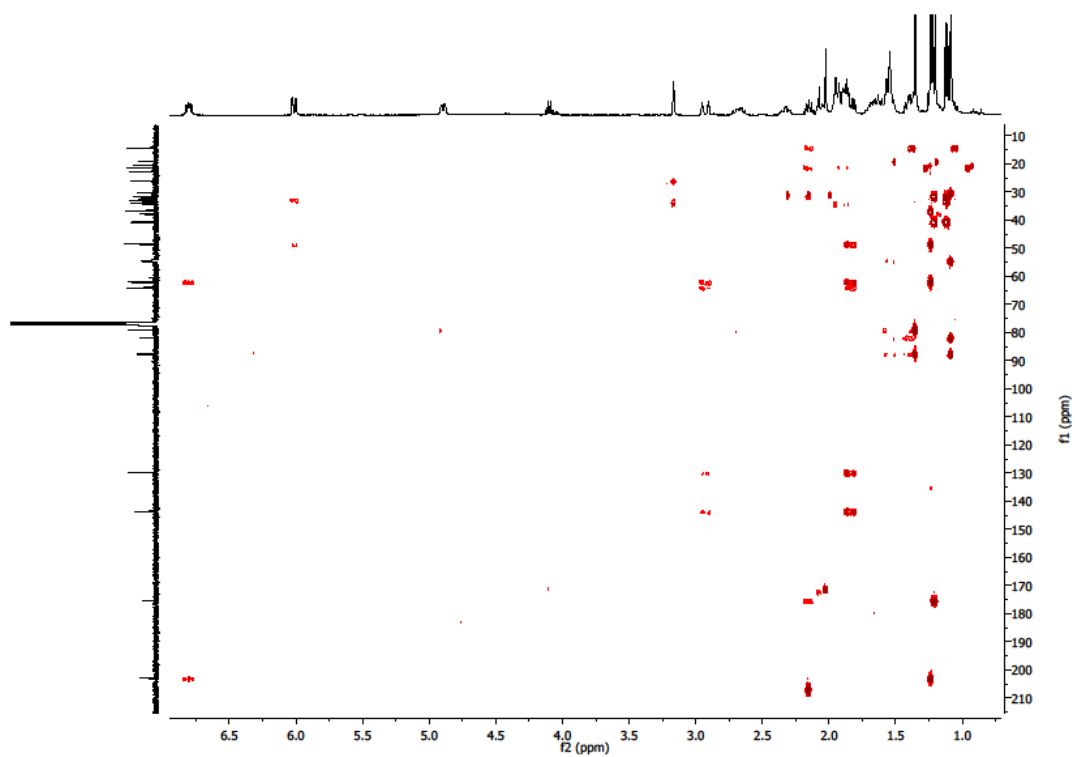

Figure S58. 1D NOESY Spectra (400 MHz) of 24,25-Dihydrowithanolide E (**11**) in CDCl<sub>3</sub>

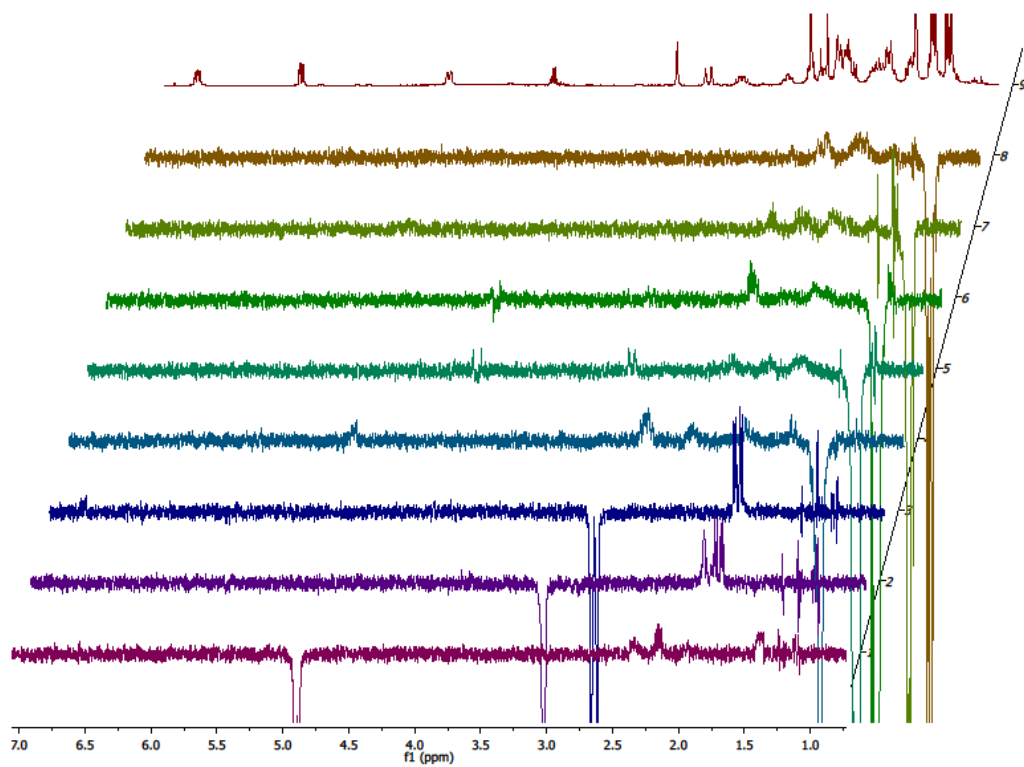



**Figure S59.** Key HMBC Correlations of **1**, **3**, **5**, and **7-11**, and  $^1\text{H}$ - $^1\text{H}$  COSY Correlations of **5** and **10**

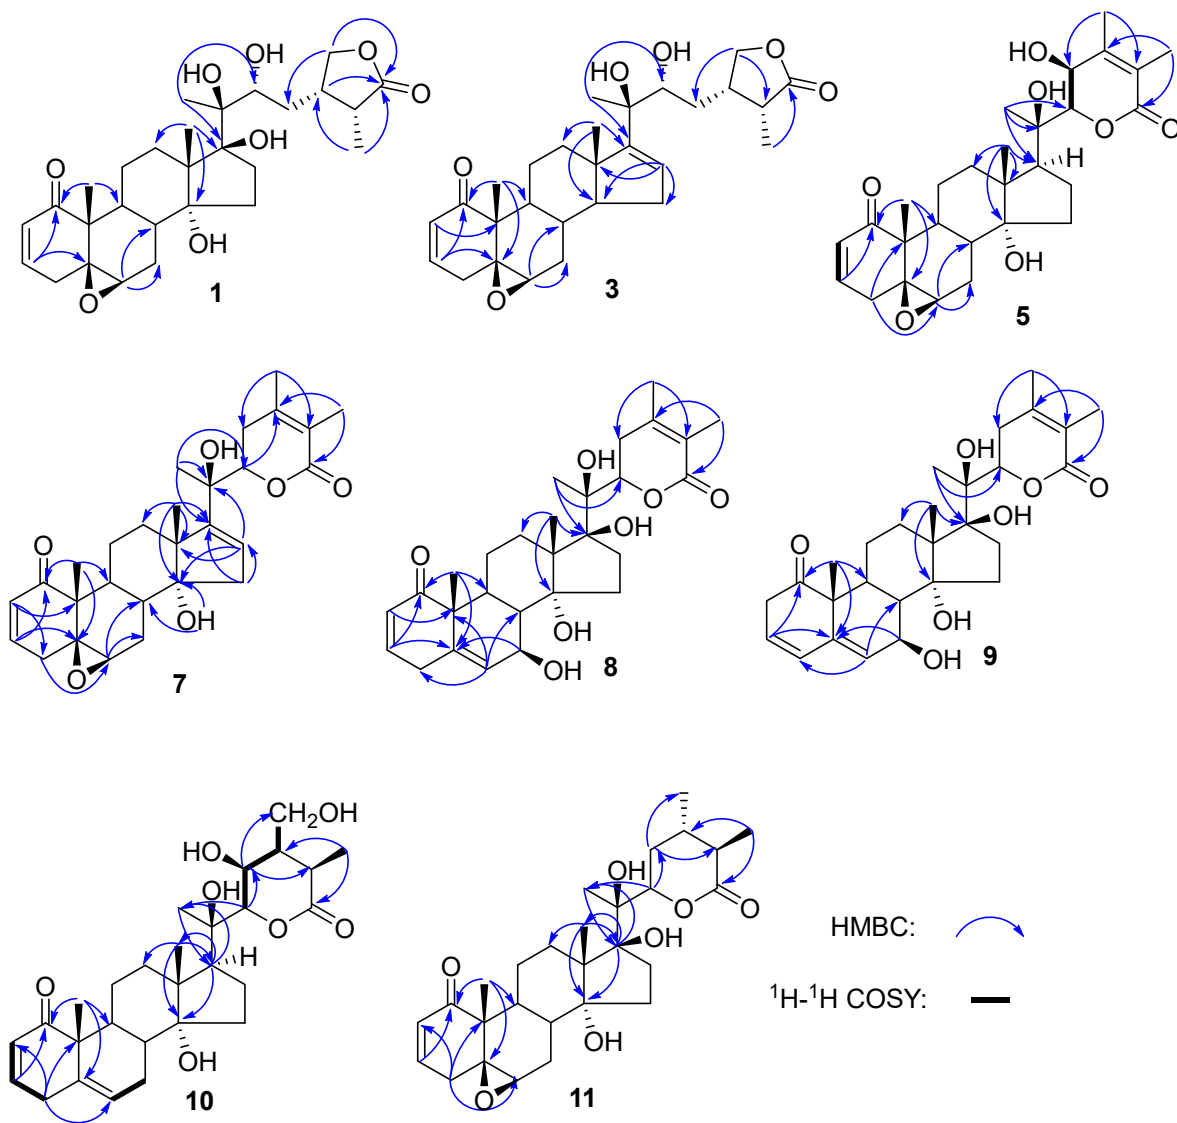

Figure S60. Key NOESY Correlations of 1, 3-5, and 7-11

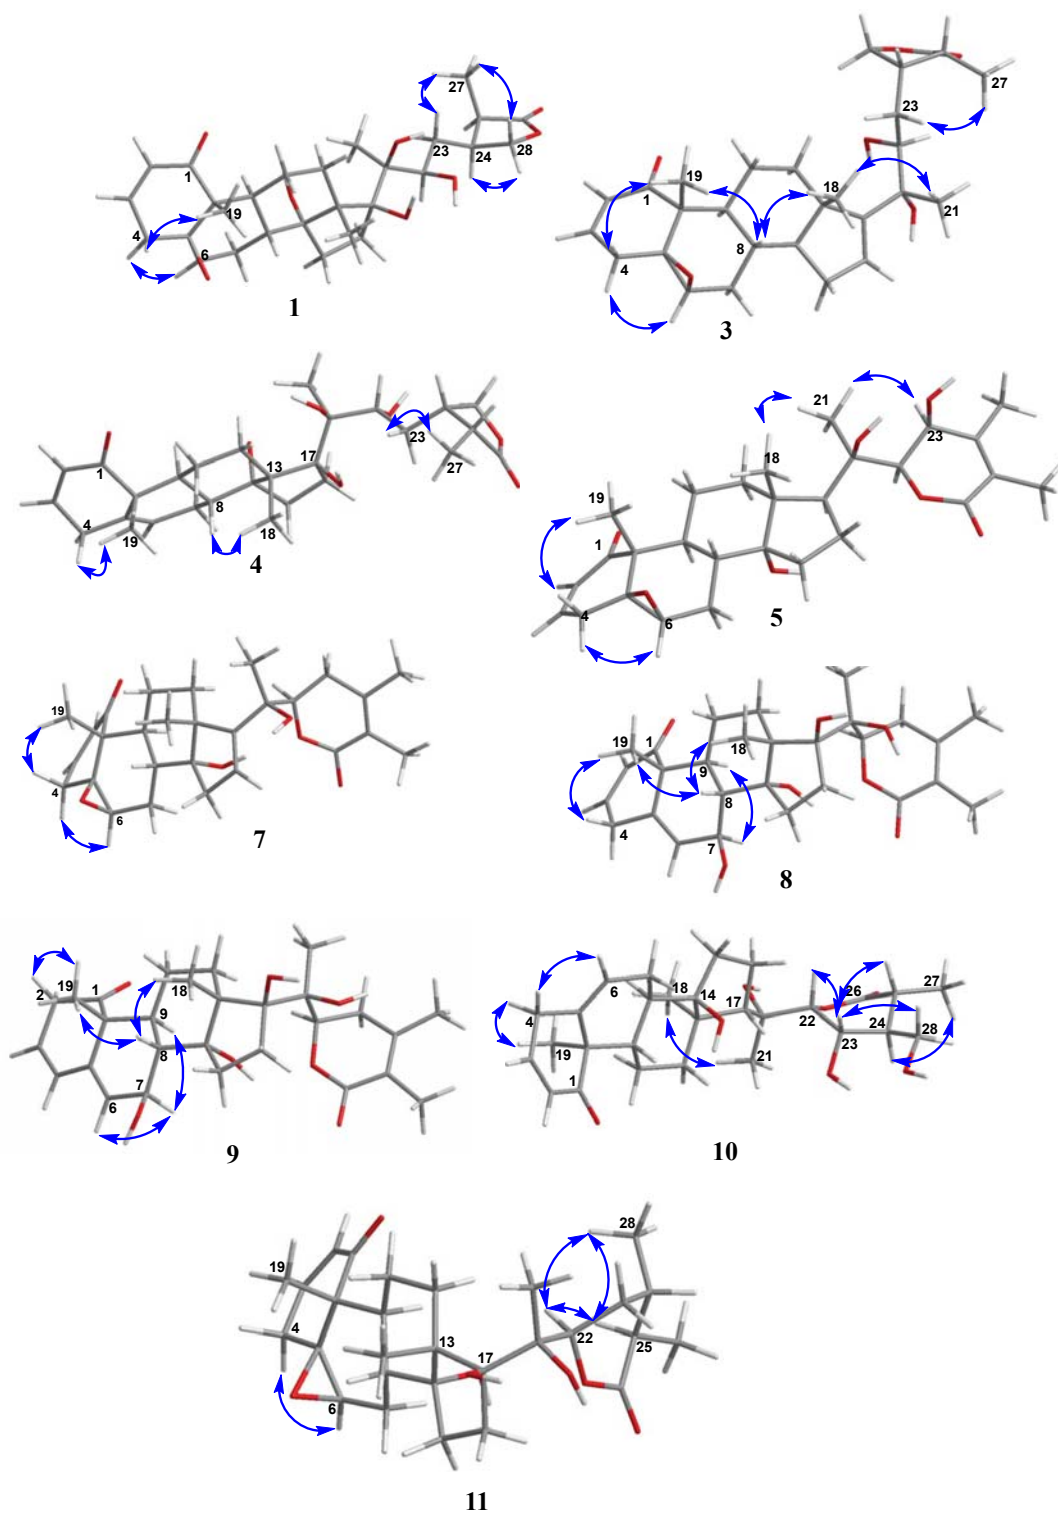

**Figure S61.** ECD spectra of **1–11**

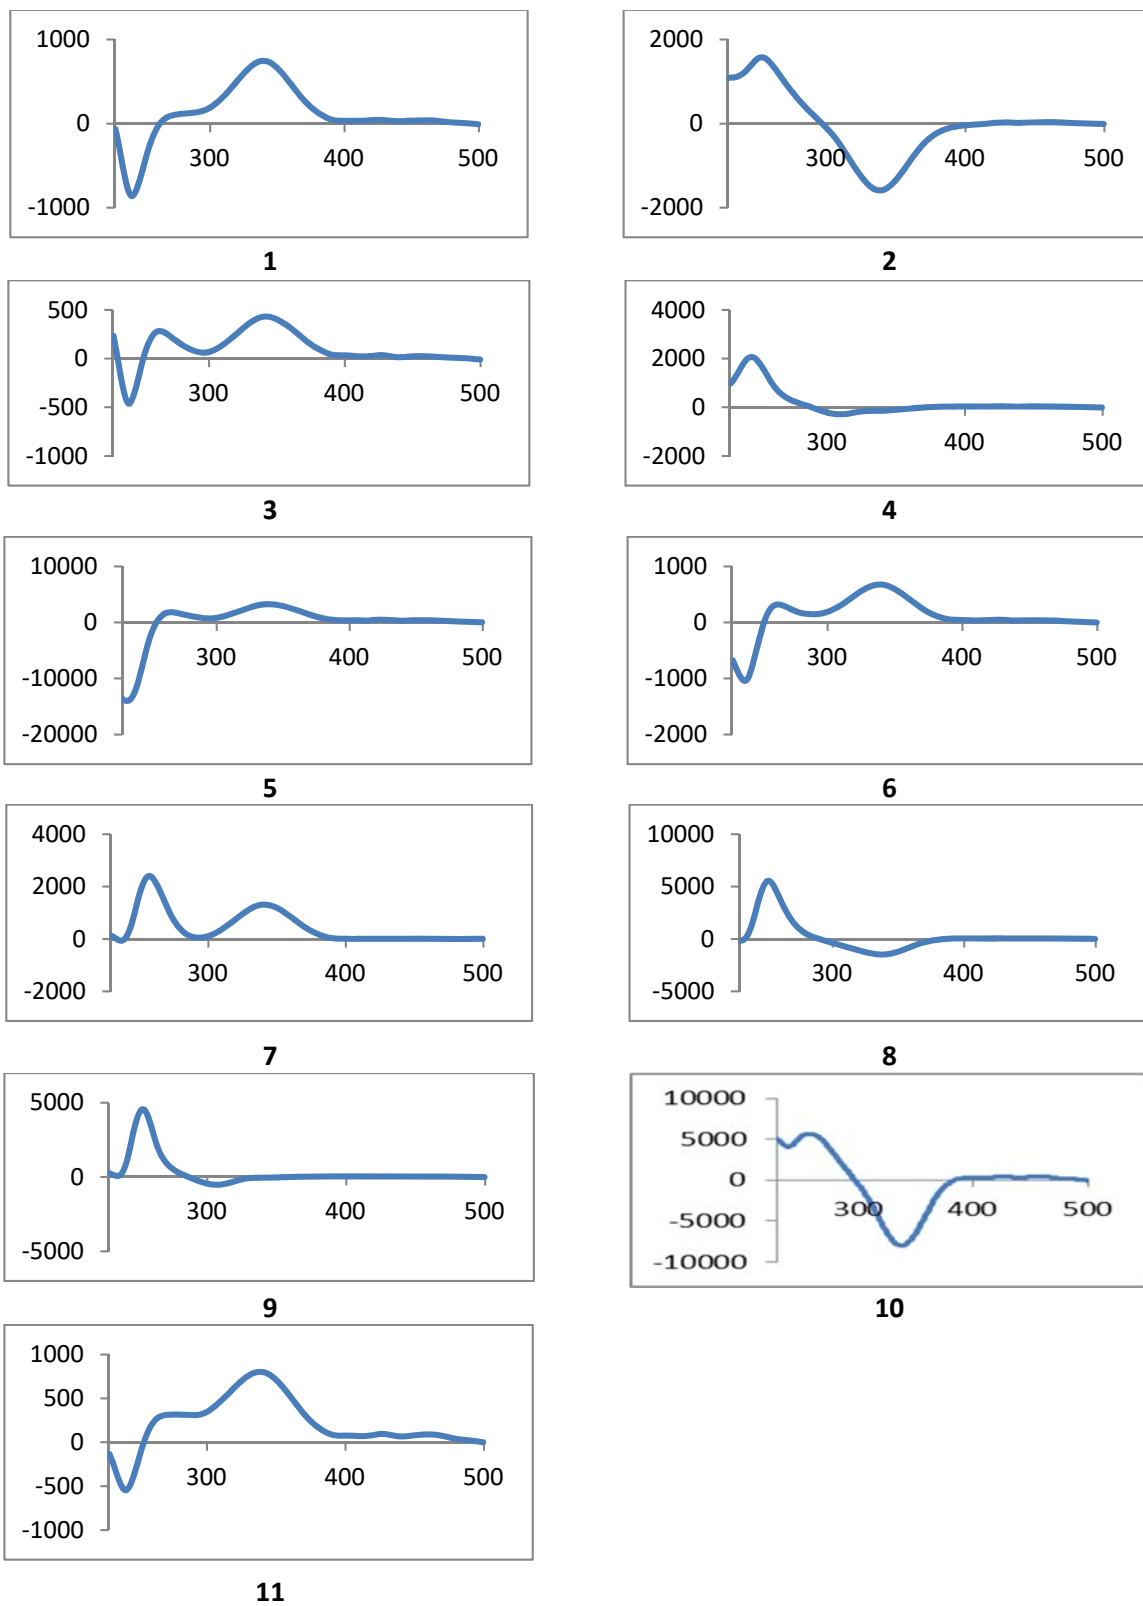

Supplement: NIHMS1066548-supplement-suppl.pdf [file NIHMS1066548-supplement-suppl.pdf]
